# Supplementary material for: Methyl and arylchalcogenolate complexes of cadmium in a sulfur rich coordination environment: syntheses and structural characterization of the tris(2-mercapto-1-tert-butylimidazolyl)hydroborato cadmium complexes [TmBut]CdMe, and [TmBut]CdEAr (E = O, S, Se, Te) and analysis of the bonding in chalcogenolate compounds
Source: Royal Society of Chemistry journal article supplement (doi:10.1039/b607916d), 2006-01-01
Supplement: b607916d.pdf [file b607916d.pdf]

## SUPPORTING INFORMATION

### **Methyl and Arylchalcogenolate Complexes of Cadmium in a Sulfur Rich Coordination Environment: Syntheses and Structural Characterization of the *Tris*(2-mercapto-1-t-butylimidazolyl)hydroborato Cadmium Complexes [Tm<sup>Bu<sup>t</sup></sup>]CdMe, and [Tm<sup>Bu<sup>t</sup></sup>]CdAr (E = O, S, Se, Te) and Analysis of the Bonding in Chalcogenolate Compounds**

Jonathan G. Melnick and Gerard Parkin,\*

*Department of Chemistry,*

*Columbia University,*

*New York, New York 10027, USA.*

E-mail: [parkin@columbia.edu](mailto:parkin@columbia.edu)

*Received xxxx xx, 2006.*

## EXPERIMENTAL SECTION

### General Considerations

All manipulations were performed using a combination of glovebox, high-vacuum and Schlenk techniques under a nitrogen or argon atmosphere, except where otherwise stated. Solvents were purified and degassed by standard procedures.  $^1\text{H}$  and  $^{13}\text{C}$  NMR spectra were measured on Bruker 300 DRX and Bruker 400 DRX spectrometers.  $^1\text{H}$  Chemical shifts are reported in ppm relative to  $\text{SiMe}_4$  ( $\delta = 0$ ) and were referenced internally with respect to the protio solvent impurity ( $\delta$  7.16 for  $\text{C}_6\text{D}_5\text{H}$  and  $\delta$  1.94 for  $\text{CD}_2\text{HCN}$ ).  $^{13}\text{C}$  NMR spectra are reported in ppm relative to  $\text{SiMe}_4$  ( $\delta = 0$ ) and were referenced internally with respect to the solvent ( $\delta$  128.06 for  $\text{C}_6\text{D}_5\text{H}$ ).  $^{113}\text{Cd}$  chemical shifts are reported relative to  $\text{CdMe}_2$  ( $\delta = 0$ ) and were referenced externally with respect to  $\text{CdCl}_2$  (1 M in  $\text{D}_2\text{O}$ ,  $\delta$  -545.1). Coupling constants are given in hertz. IR spectra were recorded as KBr pellets on a Nicolet Avatar DTGS spectrometer, and the data are reported in reciprocal centimeters.

### X-ray structure determinations

X-ray diffraction data were collected on a Bruker P4 diffractometer equipped with a SMART CCD detector and crystal data, data collection and refinement parameters are summarized in Table 3. The structures were solved using direct methods and standard difference map techniques, and were refined by full-matrix least-squares procedures on  $F^2$  with SHELXTL (Version 5.10).<sup>i</sup>

### Computational Details

All calculations were initially carried out using DFT as implemented in the Jaguar 6.0 suite of *ab initio* quantum chemistry programs.<sup>ii</sup> Geometry optimizations were performed with the B3LYP density functional<sup>iii</sup> and the 6-31G\*\* (C, H, N, B, O, S), LAV3P (Se, Te, Zn, Cd), LACVP (Zr, La) and CSDZ (Lu) basis sets. NBO charges for  $[\text{Tm}^{\text{Bu}^\dagger}]\text{ZnEPh}$ ,  $[\text{Tm}^{\text{Bu}^\dagger}]\text{CdEPh}$ ,  $\text{Cp}_2\text{Zr}(\text{EH})_2$  and  $\text{Cp}^*_2\text{Zr}(\text{EPh})_2$  were determined using the

same basis sets employed for geometry optimization, while the NBO charges for  $[\text{Tp}]_2\text{LnEPh}$  ( $\text{Ln} = \text{La}, \text{Lu}$ ) were determined using the SDDAll basis set employing Gaussian 03.<sup>iv</sup> Molecular orbital analyses were performed with the aid of Jimp 2,<sup>v</sup> which employs Fenske-Hall calculations<sup>vi</sup> and visualization using MOPLOT.<sup>vii</sup>

### Synthesis of $[\text{Tm}^{\text{But}}]\text{CdI}$

A solution of  $[\text{Tm}^{\text{But}}]\text{Tl}$  (0.200 g, 0.293 mmol) in  $\text{CH}_2\text{Cl}_2$  (20 mL) was added to a suspension of  $\text{CdI}_2$  (0.106 g, 0.289 mmol) in  $\text{CH}_2\text{Cl}_2$  (20 mL) resulting in the immediate formation of a yellow precipitate. The solution was stirred for 3 hours and allowed to settle for 30 minutes. The mixture was filtered and volatile components were removed from the filtrate under vacuum to give  $[\text{Tm}^{\text{But}}]\text{CdI}$  as a white powder (0.080 mg, 38% yield). Crystals of the composition  $[\text{Tm}^{\text{But}}]\text{CdI}$  suitable for X-ray diffraction were obtained from  $\text{CH}_3\text{CN}$ . Analysis calcd. for  $[\text{Tm}^{\text{But}}]\text{CdI}$ : C, 35.2%; H, 4.8%; N, 11.7%.

Found: C, 35.0%; H, 4.1%; N, 11.3%.  $^1\text{H}$  NMR ( $\text{C}_6\text{D}_6$ ): 1.44 [s, 27H,

$\text{HB}\{\text{C}_3\text{N}_2\text{H}_2[\text{C}(\text{CH}_3)_3\text{S}]_3\}$ , 6.36 [d, 3H,  $^3J_{\text{H-H}} = 2$ ,  $\text{HB}\{\text{C}_3\text{N}_2\text{H}_2[\text{C}(\text{CH}_3)_3\text{S}]_3\}$ , 6.62 [d, 3H,  $^3J_{\text{H-H}}$

$= 2$ ,  $\text{HB}\{\text{C}_3\text{N}_2\text{H}_2[\text{C}(\text{CH}_3)_3\text{S}]_3\}$ .  $^{13}\text{C}\{^1\text{H}\}$  NMR ( $\text{C}_6\text{D}_6$ ): 28.8 [9C,  $\text{HB}\{\text{C}_3\text{N}_2\text{H}_2[\text{C}(\text{CH}_3)_3\text{S}]_3\}$ ,

59.6 [3C,  $\text{HB}\{\text{C}_3\text{N}_2\text{H}_2[\text{C}(\text{CH}_3)_3\text{S}]_3\}$ , 117.2 [3C,  $\text{HB}\{\text{C}_2\text{N}_2\text{H}_2[\text{C}(\text{CH}_3)_3\text{CS}]_3\}$ , 123.0 [3C,

$\text{HB}\{\text{C}_2\text{N}_2\text{H}_2[\text{C}(\text{CH}_3)_3\text{CS}]_3\}$ , 157.0 [3C,  $\text{HB}\{\text{C}_2\text{N}_2\text{H}_2[\text{C}(\text{CH}_3)_3\text{CS}]_3\}$ . IR Data (KBr pellet,  $\text{cm}^{-1}$ ):

3176 (w), 3148 (m), 3106 (w), 2978 (m), 2924 (m), 2663 (w), 2466 (w), 2304 (w), 2253

(w), 1678 (w), 1568 (m), 1481 (m), 1420 (s), 1396 (m), 1362 (vs), 1307 (m), 1259 (w), 1228

(m), 1196 (vs), 1175 (s), 1137 (m), 1070 (m), 1028 (w), 981 (w), 928 (w), 819 (m), 759 (m),

732 (s), 685 (s), 587 (m), 550 (m), 493 (w), 454 (w). Mass spectrum:  $m/z = 717.2 \{M - 1\}^+$ ,

591.2  $\{M - I\}^+$ .

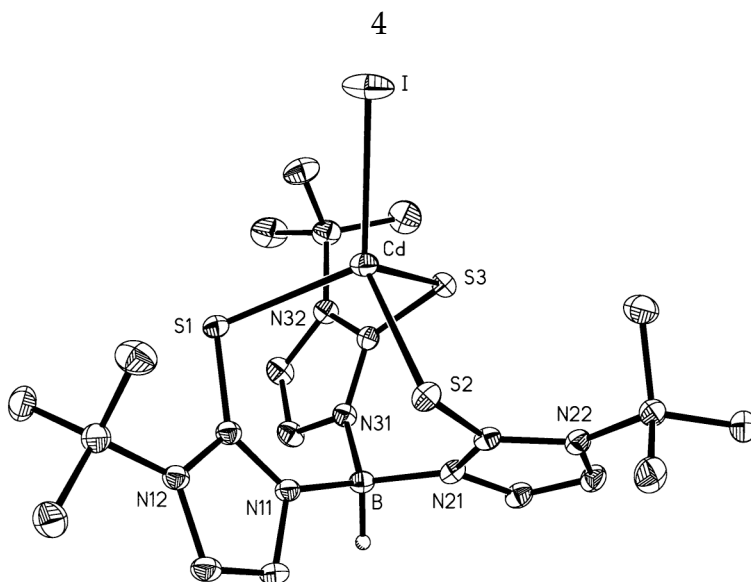

**Molecular structure of [Tm<sup>Bu<sup>t</sup></sup>]CdI**

### Synthesis of [Tm<sup>Bu<sup>t</sup></sup>]CdMe

A suspension of [Tm<sup>Bu<sup>t</sup></sup>]I (2.350 g, 3.446 mmol) in C<sub>6</sub>H<sub>6</sub> (20 mL) was added to a solution of Me<sub>2</sub>Cd (0.6 mL, 8.359 mmol) in C<sub>6</sub>H<sub>6</sub> (20 mL) resulting in the immediate deposition of a black precipitate. The mixture was stirred for 1 hour, allowed to settle for an additional 30 minutes, and filtered. The volatile components were removed from the filtrate by lyophilization and the resulting solid was washed with pentane and dried *in vacuo* to give [Tm<sup>Bu<sup>t</sup></sup>]CdMe as a white powder (1.735 g, 83 % yield). Colorless crystals of composition [Tm<sup>Bu<sup>t</sup></sup>]CdMe•0.5(Et<sub>2</sub>O) suitable for X-ray diffraction were obtained from Et<sub>2</sub>O. <sup>1</sup>H NMR (C<sub>6</sub>D<sub>6</sub>): 0.37 [s, <sup>2</sup>J<sub>Cd<sup>111</sup>-H</sub> = 67.1, <sup>2</sup>J<sub>Cd<sup>113</sup>-H</sub> = 70.0, 3H of CdCH<sub>3</sub>], 1.55 [s, 27 H of HB{C<sub>3</sub>N<sub>2</sub>H<sub>2</sub>[C(CH<sub>3</sub>)<sub>3</sub>]S<sub>3</sub>}], 6.43 [d, <sup>3</sup>J<sub>H-H</sub> = 2, 3 H of HB{C<sub>3</sub>N<sub>2</sub>H<sub>2</sub>[C(CH<sub>3</sub>)<sub>3</sub>]S<sub>3</sub>}], 6.73 [d, <sup>3</sup>J<sub>H-H</sub> = 2, 3 H of HB{C<sub>3</sub>N<sub>2</sub>H<sub>2</sub>[C(CH<sub>3</sub>)<sub>3</sub>]S<sub>3</sub>)]. <sup>13</sup>C{<sup>1</sup>H} NMR (C<sub>6</sub>D<sub>6</sub>): -10.4 [1 C, CdCH<sub>3</sub>], 28.8 [9 C, HB{C<sub>3</sub>N<sub>2</sub>H<sub>2</sub>[C(CH<sub>3</sub>)<sub>3</sub>]S<sub>3</sub>}], 59.0 [3 C, HB{C<sub>3</sub>N<sub>2</sub>H<sub>2</sub>[C(CH<sub>3</sub>)<sub>3</sub>]CS<sub>3</sub>}], 116.4 [3 C of HB{C<sub>2</sub>N<sub>2</sub>H<sub>2</sub>[C(CH<sub>3</sub>)<sub>3</sub>]CS<sub>3</sub>}], 122.5 [3 C of HB{C<sub>2</sub>N<sub>2</sub>H<sub>2</sub>[C(CH<sub>3</sub>)<sub>3</sub>]S<sub>3</sub>}], 159.3 [3 C, HB{C<sub>2</sub>N<sub>2</sub>H<sub>2</sub>[C(CH<sub>3</sub>)<sub>3</sub>]CS<sub>3</sub>)]. <sup>113</sup>Cd NMR (C<sub>6</sub>D<sub>6</sub>): 48.6. IR Data (KBr pellet, cm<sup>-1</sup>): 3182(w), 3161(m), 3131(s), 3099(w), 2962(s), 2898(s), 2821(m), 2653(w), 2497(w), 2449(m), 2423(m), 2302(w), 2248(w), 2178(w), 1688(w), 1660(w), 1583(m), 1565(m), 1518(w), 1484(m), 1455(m), 1418(s), 1396(s), 1359(vs), 1299(vs), 1254(m), 1228(s), 1195(vs), 1136(m),

1070(m), 1029(m), 978(w), 927(w), 821(m), 771(w), 757(m), 740(s), 725(s), 687(s), 639(s), 586(m), 550(m), 494(m), 456(m). Mass spectrum:  $m/z = 591.2 \{M-CH_3\}^+$ .

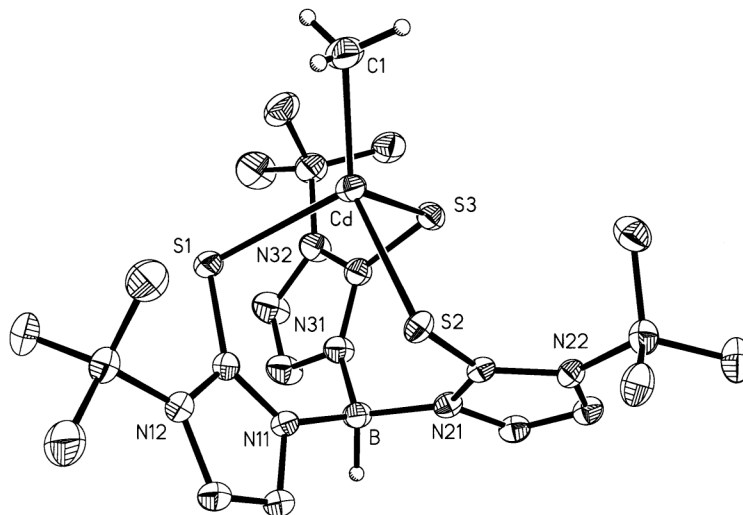

**Molecular structure of [Tm<sup>Bu<sup>t</sup>}]CdMe</sup>**

### Synthesis of [Tm<sup>Bu<sup>t</sup>}]CdOAr (Ar = 2,6-Ph<sub>2</sub>C<sub>6</sub>H<sub>3</sub>)</sup>

A mixture of [Tm<sup>Bu<sup>t</sup>}]CdMe (195 mg, 0.322 mmol) and 2,6-diphenylphenol (80 mg, 0.325 mmol) was treated with C<sub>6</sub>H<sub>6</sub> (20 mL). The solution was stirred for 1 day leading to the formation of a white precipitate. The volatile components were removed by lyophilization to give [Tm<sup>Bu<sup>t</sup>}]CdOAr (Ar = 2,6-Ph<sub>2</sub>C<sub>6</sub>H<sub>3</sub>) as a white solid (173 mg, 64% yield). Crystals of composition [Tm<sup>Bu<sup>t</sup>}]CdOAr·C<sub>7</sub>H<sub>8</sub> suitable for X-ray diffraction were obtained from toluene. Analysis calcd. for [Tm<sup>Bu<sup>t</sup>}]CdOAr·0.5(C<sub>7</sub>H<sub>8</sub>): C, 57.9%; H, 5.8%; N, 9.5%. Found: C, 57.9%; H, 5.6%; N, 9.2%. <sup>1</sup>H NMR (C<sub>6</sub>D<sub>6</sub>): 1.31 [s, 27H, HB{C<sub>3</sub>N<sub>2</sub>H<sub>2</sub>[C(CH<sub>3</sub>)<sub>3</sub>]S<sub>3</sub>}], 6.22 [d, 3H, <sup>3</sup>J<sub>H-H</sub> = 2, HB{C<sub>3</sub>N<sub>2</sub>H<sub>2</sub>[C(CH<sub>3</sub>)<sub>3</sub>]S<sub>3</sub>}], 6.44 [d, 3H, <sup>3</sup>J<sub>H-H</sub> = 2, HB{C<sub>3</sub>N<sub>2</sub>H<sub>2</sub>[C(CH<sub>3</sub>)<sub>3</sub>]S<sub>3</sub>}], 6.91 [t, 1H, <sup>3</sup>J<sub>H-H</sub> = 7, CdOC<sub>6</sub>H<sub>3</sub>(Ph)<sub>2</sub>], 7.16 [obscured by solvent, 2H, OC<sub>6</sub>H<sub>3</sub>(C<sub>6</sub>H<sub>5</sub>)<sub>2</sub>], 7.38 [t, 4H, <sup>3</sup>J<sub>H-H</sub> = 7, CdOC<sub>6</sub>H<sub>3</sub>(C<sub>6</sub>H<sub>5</sub>)<sub>2</sub>], 7.53 [d, 2H, <sup>3</sup>J<sub>H-H</sub> = 7, CdOC<sub>6</sub>H<sub>3</sub>(Ph)<sub>2</sub>], 8.29 [d, 4H, <sup>3</sup>J<sub>H-H</sub> = 7, CdOC<sub>6</sub>H<sub>3</sub>(Ph)<sub>2</sub>]. IR Data (KBr pellet, cm<sup>-1</sup>): 3518 (w), 3189 (w), 3170 (m), 3140 (m), 3031 (w), 2999 (w), 2970 (m), 2912 (m), 2653 (w), 2415 (w), 2267 (w), 2238 (w), 1595 (w), 1568 (w), 1480 (w), 1454 (m), 1400 (s), 1357 (vs), 1301 (m), 1282 (m), 1263 (m), 1227 (w), 1193 (s), 1173 (s), 1134 (m), 1089 (w), 1067 (m), 1028</sup></sup></sup></sup>

(w), 1010 (w), 927 (w), 842 (w), 819 (w), 751 (m), 732 (w), 722 (m), 697 (m), 684 (m), 585 (m), 550 (s), 496 (m), 458 (w), 427(w). Mass spectrum:  $m/z = 591.3 \{M - OAr\}^+$ .

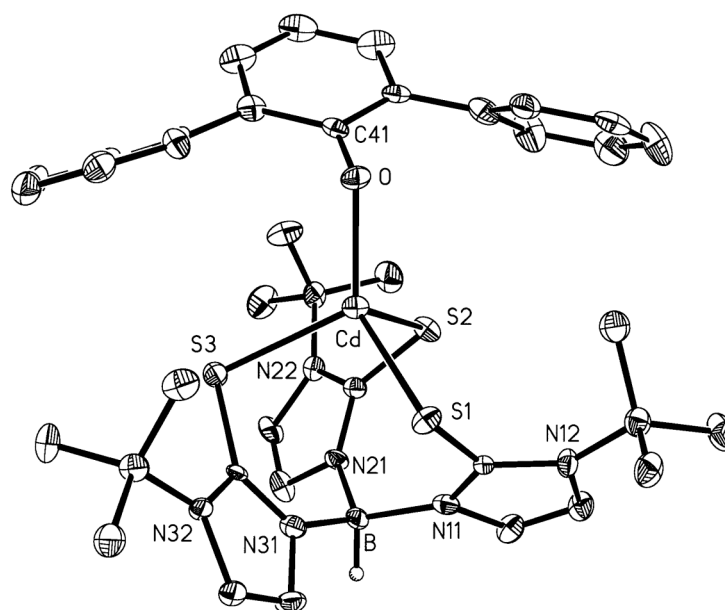

**Molecular structure of  $[Tm^{Bu^t}]CdOC_6H_3Ph_2$**

### Synthesis of $[Tm^{Bu^t}]CdSPh$

A solution of  $[Tm^{Bu^t}]CdMe$  (120 mg, 0.198 mmol) in  $C_6H_6$  (20 mL) was treated with PhSH (50  $\mu$ L, 0.487 mmol) and stirred for 2h. The volatile components were removed by lyophilization to give  $[Tm^{Bu^t}]CdSPh$  as a white solid (79 mg, 57% yield). Crystals of composition  $[Tm^{Bu^t}]CdSPh \cdot (C_6H_6)_x$  suitable for X-ray diffraction were obtained from  $C_6H_6$ . Analysis calcd. for  $[Tm^{Bu^t}]CdSPh$ : C, 46.4%; H, 5.6%; N, 12.0%. Found: C, 46.0%; H, 4.9%; N, 11.0%.  $^1H$  NMR ( $C_6D_6$ ): 1.43 [s, 27H,  $HB\{C_3N_2H_2[C(CH_3)_3]S\}_3$ ], 6.37 [d, 3H,  $^3J_{H-H} = 2$ ,  $HB\{C_3N_2H_2[C(CH_3)_3]S\}_3$ ], 6.63 [d, 3H,  $^3J_{H-H} = 2$ ,  $HB\{C_3N_2H_2[C(CH_3)_3]S\}_3$ ], 6.90 [br, 1H,  $p$ -CdSPh], 7.00 [br m, 2H,  $m$ -CdSPh], 7.90 [br, 2H,  $o$ -CdSPh].  $^{13}C\{^1H\}$  NMR ( $C_6D_6$ ): 28.8 [9C,  $HB\{C_3N_2H_2[C(CH_3)_3]S\}_3$ ], 59.4 [3C,  $HB\{C_3N_2H_2[C(CH_3)_3]S\}_3$ ], 117.0 [3C,  $HB\{C_2N_2H_2[C(CH_3)_3]CS\}_3$ ], 122.9 [3C,  $HB\{C_2N_2H_2[C(CH_3)_3]CS\}_3$ ], 134.6 CdSPh], 157.4 [3C,  $HB\{C_2N_2H_2[C(CH_3)_3]CS\}_3$ ]. IR Data (KBr pellet,  $cm^{-1}$ ): 3179 (w), 3146 (w), 3064 (w), 2976 (m), 2925 (w), 2655 (w), 2486 (w), 2404 (w), 2293 (w), 2227 (w), 1567 (m), 1473 (m), 1416

(m), 1397 (w), 1359 (vs), 1303 (m), 1261 (w), 1227 (w), 1194 (s), 1172 (s), 1129 (w), 1085 (w), 1069 (w), 1025 (w), 928 (w), 820 (w), 757 (w), 731 (m), 687 (m), 588 (w), 551 (w), 493 (w), 475 (w), 421 (m). Mass spectrum:  $m/z = 699.3 \{M - 1\}^+$ ,  $591.2 \{M - SPh\}^+$ .

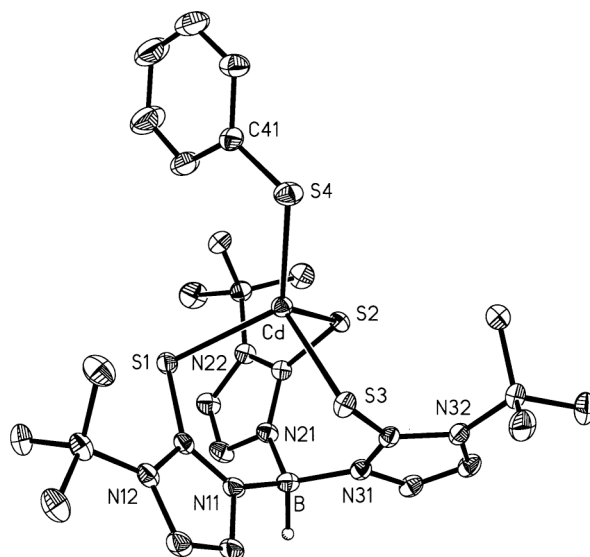

Molecular structure of  $[Tm^{Bu^t}]CdSPH$

### Synthesis of $[Tm^{Bu^t}]CdSePh$

A solution of  $[Tm^{Bu^t}]CdMe$  (90 mg, 0.149 mmol) in  $C_6H_6$  (15 mL) was treated with  $PhSeH$  (50  $\mu$ L, 0.471 mmol) and stirred for 3 hours. The volatile components were removed by lyophilization and the resulting solid was extracted into  $C_6H_6$  and filtered. The volatile components were removed from the filtrate by lyophilization to give  $[Tm^{Bu^t}]CdSePh$  as a white solid (57 mg, 51 % yield). Crystals of composition  $[Tm^{Bu^t}]CdSePh \cdot (C_6H_6)$  suitable for X-ray diffraction were obtained from  $C_6H_6$ . Analysis calcd. for  $[Tm^{Bu^t}]CdSePh$ : C, 43.5%; H, 5.3%; N, 11.3%. Found: C, 41.7%; H, 4.8%; N, 10.3%.  $^1H$  NMR ( $C_6D_6$ ): 1.45 [s, 27H,  $HB\{C_3N_2H_2[C(CH_3)_3]S\}_3$ ], 6.37 [d, 3H,  $^3J_{H-H} = 2$ ,  $HB\{C_3N_2H_2[C(CH_3)_3]S\}_3$ ], 6.64 [d, 3H,  $^3J_{H-H} = 2$ ,  $HB\{C_3N_2H_2[C(CH_3)_3]S\}_3$ ], 6.95-7.05 [m, 3H, *p,m*-CdSePh], 8.18 [d, 2H,  $^3J_{H-H} = 6$ , *o*-CdSePh].  $^{13}C\{^1H\}$  NMR ( $C_6D_6$ ): 28.7 [9C,  $HB\{C_3N_2H_2[C(CH_3)_3]S\}_3$ ], 59.4 [3C,  $HB\{C_3N_2H_2[C(CH_3)_3]S\}_3$ ], 117.0 [3C,  $HB\{C_2N_2H_2[C(CH_3)_3]CS\}_3$ ], 122.8 [3C,  $HB\{C_2N_2H_2[C(CH_3)_3]CS\}_3$ ], 137.2 [3C,  $HB\{C_2N_2H_2[C(CH_3)_3]CS\}_3$ ]. IR Data (KBr pellet,  $cm^{-1}$ ): 3448(br), 3180(w), 3144(w),

3060(w), 2975(m), 2924(w), 2412(w), 1572(m), 1471(m), 1418(m), 1397(w), 1359(vs),  
1303(w), 1260(w), 1227(w), 1195(s), 1174(s), 1132(w), 1106(s), 1069(m), 1022(w), 821(w),  
760(w), 729(m), 686(m), 667(w), 552(w), 494(m), 464(m).

Mass spectrum:  $m/z = 591.3 \{M\text{-SePh}\}^+$ .

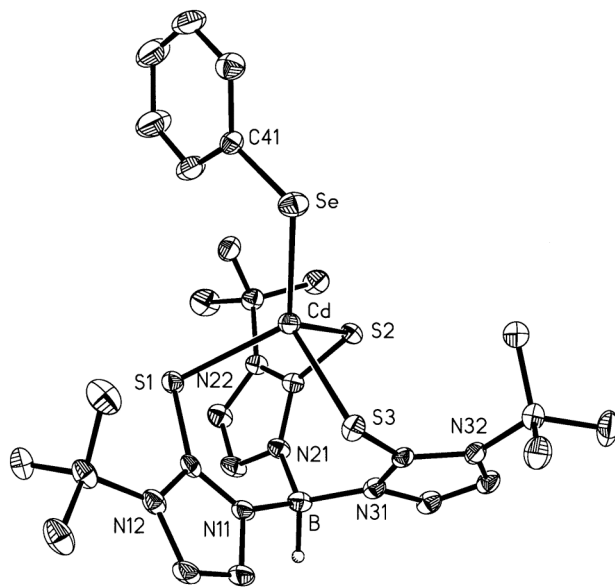

Molecular structure of  $[\text{Tm}^{\text{Bu}^t}]\text{CdSePh}$

### Synthesis of $[\text{Tm}^{\text{Bu}^t}]\text{CdTePh}$

A mixture of  $[\text{Tm}^{\text{Bu}^t}]\text{CdMe}$  (100 mg, 0.165 mmol) and  $\text{Ph}_2\text{Te}_2$  (68 mg, 0.166 mmol) was treated with  $\text{C}_6\text{H}_6$  (20 mL) resulting in the immediate deposition of a dark precipitate. The solution was stirred for 1 hr. and allowed to settle for 30 minutes. The mixture was filtered and the volatile components were removed from the filtrate by lyophilization. The resulting solid was washed twice with pentane and residual solvent removed under vacuum to give  $[\text{Tm}^{\text{Bu}^t}]\text{CdTePh}$  as a white powder (84 mg, 64% yield). Crystals suitable for X-ray diffraction were obtained from  $\text{Et}_2\text{O}$ . Analysis calcd. for  $[\text{Tm}^{\text{Bu}^t}]\text{CdTePh}$ : C, 40.8%; H, 4.9%; N, 10.6%. Found: C, 40.3%; H, 4.0%; N, 10.1%.  $^1\text{H}$  NMR ( $\text{C}_6\text{D}_6$ ): 1.45 [s, 27H,  $\text{HB}\{\text{C}_3\text{N}_2\text{H}_2[\text{C}(\text{CH}_3)_3\text{S}]\}_3$ ], 6.38 [d, 3H,  $^3J_{\text{H-H}} = 2$ ,  $\text{HB}\{\text{C}_3\text{N}_2\text{H}_2[\text{C}(\text{CH}_3)_3\text{S}]\}_3$ ], 6.65 [d, 3H,  $^3J_{\text{H-H}} = 2$ ,  $\text{HB}\{\text{C}_3\text{N}_2\text{H}_2[\text{C}(\text{CH}_3)_3\text{S}]\}_3$ ], 6.90 [t, 2H,  $^3J_{\text{H-H}} = 7$ , *m*-CdTePh], 7.03 [t, 1H,  $^3J_{\text{H-H}} = 7$ , *m*-CdTePh], 8.35 [d, 2H,  $^3J_{\text{H-H}} = 7$ , *o*-CdTePh].



$^{13}\text{C}\{^1\text{H}\}$  NMR ( $\text{C}_6\text{D}_6$ ): 28.8 [9C, HB{ $\text{C}_3\text{N}_2\text{H}_2[\text{C}(\underline{\text{C}}(\text{CH}_3)_3]\text{S}\}_3$ ], 59.4 [3C, HB{ $\text{C}_3\text{N}_2\text{H}_2[\underline{\text{C}}(\text{CH}_3)_3]\text{S}\}_3$ ], 116.9 [3C, HB{ $\text{C}_2\text{N}_2\text{H}_2[\text{C}(\text{CH}_3)_3]\text{CS}\}_3$ ], 122.8 [3C, HB{ $\text{C}_2\text{N}_2\text{H}_2[\text{C}(\text{CH}_3)_3]\text{CS}\}_3$ ], 142.5 [3C, HB{ $\text{C}_2\text{N}_2\text{H}_2[\text{C}(\text{CH}_3)_3]\underline{\text{C}}\text{S}\}_3$ ]. IR Data (KBr pellet,  $\text{cm}^{-1}$ ): 3425 (br), 3179 (w), 3146 (w), 3064 (w), 2969 (m), 2924 (m), 2407 (w), 2374 (m), 2225 (m), 1563 (m), 1545 (w), 1525 (w), 1510 (w), 1476 (m), 1416 (m), 1398 (w), 1358 (s), 1302 (m), 1260 (m), 1226 (m), 1192 (vs), 1170 (s), 1098 (s), 1065 (s), 1019 (s), 818 (m), 799 (m), 775 (w), 756 (w), 729 (m), 687 (m), 672 (w), 651 (w), 629 (w), 606 (w), 586 (w), 544 (w), 512 (m), 491 (m), 467 (s), 452 (s), 421 (w). Mass spectrum:  $m/z = 795.3 \{\text{M} - 1\}^+$ , 591.3  $\{\text{M} - \text{TePh}\}^+$ .

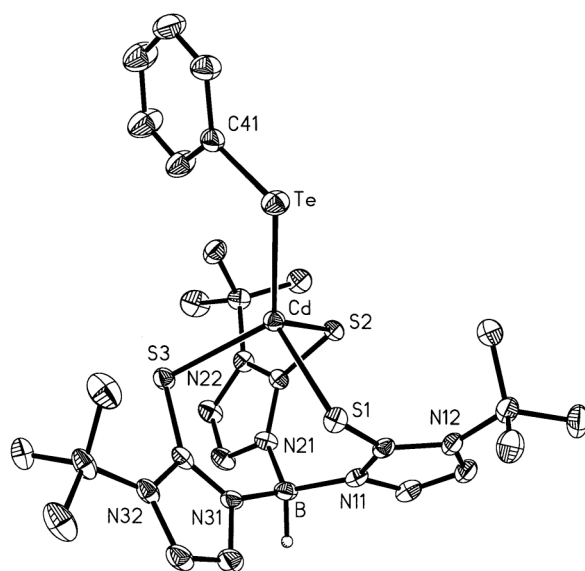

Molecular structure of  $[\text{Tm}^{\text{Bu}^t}]\text{CdTePh}$

### Synthesis of $[\text{Tm}^{\text{Bu}^t}]\text{CdSC}_6\text{H}_4\text{Me}$

A solution of  $[\text{Tm}^{\text{Bu}^t}]\text{CdMe}$  (ca. 5 mg) in  $\text{C}_6\text{D}_6$  was treated with *p*-TolSH (ca. 2 mg) in  $\text{C}_6\text{D}_6$  and was monitored by  $^1\text{H}$  NMR spectroscopy, thereby demonstrating the immediate formation of  $[\text{Tm}^{\text{Bu}^t}]\text{CdSC}_6\text{H}_4\text{Me}$  in quantitative yield. The volatile components were removed by lyophilization to give  $[\text{Tm}^{\text{Bu}^t}]\text{CdSC}_6\text{H}_4\text{Me}$  as a white solid. Crystals of composition  $[\text{Tm}^{\text{Bu}^t}]\text{CdSC}_6\text{H}_4\text{Me} \cdot 2(\text{C}_6\text{H}_6)$  suitable for X-ray diffraction were obtained from  $\text{C}_6\text{H}_6$ .  $^1\text{H}$  NMR ( $\text{C}_6\text{D}_6$ ): 1.44 [s, 27H, HB{ $\text{C}_3\text{N}_2\text{H}_2[\text{C}(\underline{\text{C}}(\text{CH}_3)_3]\text{S}\}_3$ ], 2.15 [s,

3H, CdSC<sub>6</sub>H<sub>4</sub>CH<sub>3</sub>], 6.37 [d, 3H, <sup>3</sup>J<sub>H-H</sub> = 2, HB{C<sub>3</sub>N<sub>2</sub>H<sub>2</sub>[C(CH<sub>3</sub>)<sub>3</sub>]S<sub>3</sub>}], 6.64 [d, 3H, <sup>3</sup>J<sub>H-H</sub> = 2, HB{C<sub>3</sub>N<sub>2</sub>H<sub>2</sub>[C(CH<sub>3</sub>)<sub>3</sub>]S<sub>3</sub>}], 6.91 [d, 2H, <sup>3</sup>J<sub>H-H</sub> = 8, CdSC<sub>6</sub>H<sub>4</sub>Me], 7.96 [d, 2H, <sup>3</sup>J<sub>H-H</sub> = 8, CdSC<sub>6</sub>H<sub>4</sub>Me].

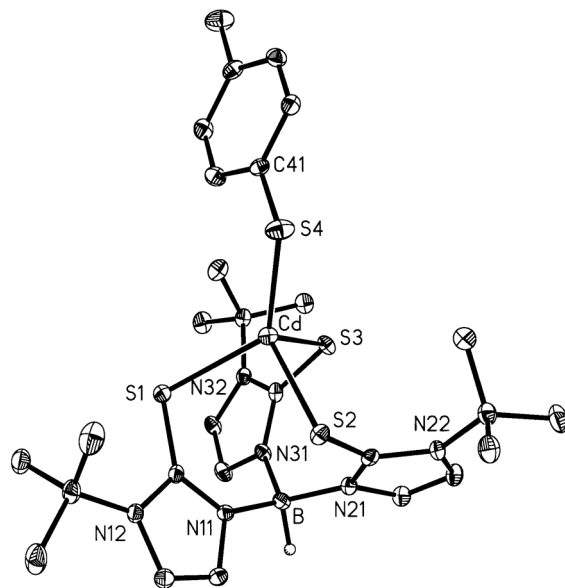

Molecular structure of [Tm<sup>But</sup>]CdSTol

### Synthesis of [Tm<sup>But</sup>]CdSC<sub>6</sub>H<sub>4</sub>NO<sub>2</sub>

A mixture of [Tm<sup>But</sup>]CdMe (100 mg, 0.165 mmol) and *p*-NO<sub>2</sub>C<sub>6</sub>H<sub>4</sub>SH (26 mg, 0.168 mmol) were treated with C<sub>6</sub>H<sub>6</sub> (20 mL) resulting in a yellow solution. The mixture was stirred for 2 hours and the volatile components were removed by lyophilization to give [Tm<sup>But</sup>]CdSC<sub>6</sub>H<sub>4</sub>NO<sub>2</sub> as a yellow solid (65 mg, 53 % yield). <sup>1</sup>H NMR (C<sub>6</sub>H<sub>6</sub>): 1.40 [s, 27H, HB{C<sub>3</sub>N<sub>2</sub>H<sub>2</sub>[C(CH<sub>3</sub>)<sub>3</sub>]S<sub>3</sub>}], 6.36 [d, 3H, <sup>3</sup>J<sub>H-H</sub> = 2.4, HB{C<sub>3</sub>N<sub>2</sub>H<sub>2</sub>[C(CH<sub>3</sub>)<sub>3</sub>]S<sub>3</sub>}], 6.60 [d, 3H, <sup>3</sup>J<sub>H-H</sub> = 2.4, HB{C<sub>3</sub>N<sub>2</sub>H<sub>2</sub>[C(CH<sub>3</sub>)<sub>3</sub>]S<sub>3</sub>}], 7.76 [A part of "AB" quartet, 2H, <sup>3</sup>J<sub>H-H</sub> = 9, CdSC<sub>6</sub>H<sub>4</sub>NO<sub>2</sub>], 7.87 [B part of "AB" quartet, d, 2H, <sup>3</sup>J<sub>H-H</sub> = 9, CdSC<sub>6</sub>H<sub>4</sub>NO<sub>2</sub>].

### Synthesis of [Tm<sup>But</sup>]<sub>2</sub>Cd

A mixture of [Tm<sup>But</sup>]Tl (220 mg, 0.323 mmol) and CdI<sub>2</sub> (59 mg, 0.161 mmol) was treated with CH<sub>2</sub>Cl<sub>2</sub> (30 mL) resulting in the immediate deposition of a yellow precipitate. The solution was stirred for 3 hours and allowed to settle for 1 hour. The mixture was

filtered and the volatile components were removed *in vacuo* from the filtrate to give  $[\text{Tm}^{\text{Bu}^t}]_2\text{Cd}$  as a white powder (112 mg, 65% yield). Crystals of the composition  $[\text{Tm}^{\text{Bu}^t}]_2\text{Cd}$  suitable for X-ray diffraction were obtained from  $\text{CH}_2\text{Cl}_2$ .  $^1\text{H}$  NMR ( $\text{CD}_3\text{CN}$ ): 1.75 [s, 54H,  $[\text{HB}\{\text{C}_3\text{N}_2\text{H}_2[\text{C}(\text{CH}_3)_3]\text{S}\}_3]_2\text{Cd}$ ], 6.51 [d, 6H,  $^3J_{\text{H-H}} = 2$ ,  $[\text{HB}\{\text{C}_3\text{N}_2\text{H}_2[\text{C}(\text{CH}_3)_3]\text{S}\}_3]_2\text{Cd}$ ], 7.03 [d, 6H,  $^3J_{\text{H-H}} = 2$ ,  $[\text{HB}\{\text{C}_3\text{N}_2\text{H}_2[\text{C}(\text{CH}_3)_3]\text{S}\}_3]_2\text{Cd}$ ].  $^{13}\text{C}\{^1\text{H}\}$  NMR ( $\text{C}_6\text{D}_6$ ): 28.6 [18C,  $[\text{HB}\{\text{C}_3\text{N}_2\text{H}_2[\text{C}(\text{CH}_3)_3]\text{S}\}_3]_2\text{Cd}$ ], 58.5 [6C,  $[\text{HB}\{\text{C}_3\text{N}_2\text{H}_2[\text{C}(\text{CH}_3)_3]\text{S}\}_3]_2\text{Cd}$ ], 114.7 [6C,  $[\text{HB}\{\text{C}_2\text{N}_2\text{H}_2[\text{C}(\text{CH}_3)_3]\text{CS}\}_3]_2\text{Cd}$ ], 125.0 [6C,  $[\text{HB}\{\text{C}_2\text{N}_2\text{H}_2[\text{C}(\text{CH}_3)_3]\text{CS}\}_3]_2\text{Cd}$ ], not observed [6C,  $\text{HB}(\text{C}_2\text{N}_2\text{H}_2[\text{C}(\text{CH}_3)_3]\text{CS})_3$ ]. IR Data (KBr pellet,  $\text{cm}^{-1}$ ): 3433 (br), 3144 (w), 2973 (m), 2923 (w), 2462 (w), 2361 (w), 2340 (w), 1656 (w), 1564 (w), 1481 (w), 1400 (m), 1358 (vs), 1295 (m), 1261 (m), 1199 (s), 1162 (m), 1101 (m), 1057 (w), 983 (w), 928 (w), 821 (w), 771 (w), 713 (m), 680 (m), 595 (w), 547 (w), 495 (w), 467 (w). Mass spectrum:  $m/z = 1068.6 \{M\}^+$ .

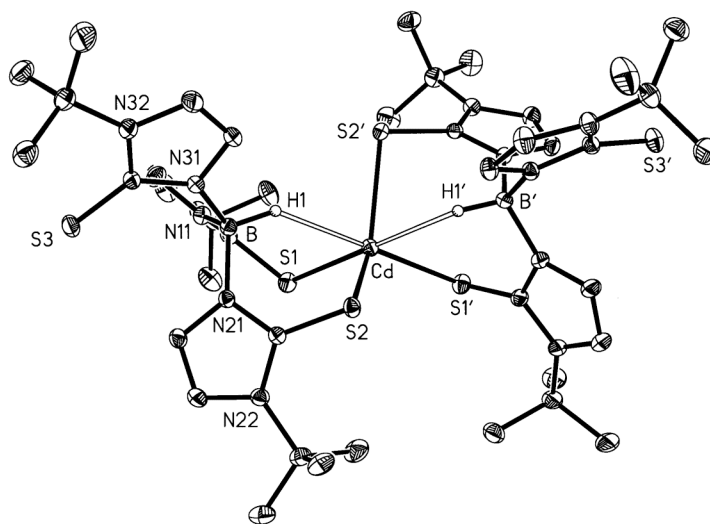

Molecular structure of  $[\text{Tm}^{\text{Bu}^t}]_2\text{Cd}$

**Table 1.** Calculated  $d(\text{M-E})$  bond length and NBO charges for  $[\text{Tm}^{\text{But}}]\text{ZnEPh}$ ,  $[\text{Tm}^{\text{But}}]\text{CdEPh}$ ,  $\text{Cp}^*_2\text{Zr}(\text{EPh})_2$ , and  $[\text{Tp}]_2\text{LaEPh}$ .

|                                         | $d(\text{M-E})/\text{\AA}$ | $q_{\text{M}}$ | $q_{\text{E}}$ | $[q_{\text{M}}q_{\text{E}}/d^2]/\text{\AA}^{-2}$ |
|-----------------------------------------|----------------------------|----------------|----------------|--------------------------------------------------|
| $[\text{Tm}^{\text{But}}]\text{ZnOPh}$  | 1.917                      | 1.465          | -0.929         | -0.370                                           |
| $[\text{Tm}^{\text{But}}]\text{ZnSPh}$  | 2.336                      | 1.370          | -0.527         | -0.132                                           |
| $[\text{Tm}^{\text{But}}]\text{ZnSePh}$ | 2.493                      | 1.326          | -0.447         | -0.095                                           |
| $[\text{Tm}^{\text{But}}]\text{ZnTePh}$ | 2.678                      | 1.280          | -0.316         | -0.056                                           |
|                                         |                            |                |                |                                                  |
| $[\text{Tm}^{\text{But}}]\text{CdOPh}$  | 2.109                      | 1.481          | -0.909         | -0.303                                           |
| $[\text{Tm}^{\text{But}}]\text{CdSPh}$  | 2.517                      | 1.394          | -0.518         | -0.114                                           |
| $[\text{Tm}^{\text{But}}]\text{CdSePh}$ | 2.651                      | 1.344          | -0.437         | -0.084                                           |
| $[\text{Tm}^{\text{But}}]\text{CdTePh}$ | 2.832                      | 1.297          | -0.312         | -0.050                                           |
|                                         |                            |                |                |                                                  |
| $\text{Cp}^*_2\text{Zr}(\text{OPh})_2$  | 2.105                      | 1.933          | -0.796         | -0.347                                           |
| $\text{Cp}^*_2\text{Zr}(\text{SPh})_2$  | 2.560                      | 1.149          | -0.170         | -0.030                                           |
| $\text{Cp}^*_2\text{Zr}(\text{SePh})_2$ | 2.722                      | 0.981          | -0.051         | -0.007                                           |
| $\text{Cp}^*_2\text{Zr}(\text{TePh})_2$ | 2.939                      | 0.761          | 0.152          | 0.013                                            |
|                                         |                            |                |                |                                                  |
| $[\text{Tp}]_2\text{LaOPh}$             | 2.280                      | 2.794          | -1.066         | -0.573                                           |
| $[\text{Tp}]_2\text{LaSPh}$             | 2.894                      | 2.713          | -0.614         | -0.199                                           |
| $[\text{Tp}]_2\text{LaSePh}$            | 3.061                      | 2.728          | -0.584         | -0.170                                           |
| $[\text{Tp}]_2\text{LaTePh}$            | 3.314                      | 2.698          | -0.485         | -0.119                                           |
|                                         |                            |                |                |                                                  |
| $[\text{Tp}]_2\text{LuOPh}$             | 2.068                      | 2.025          | -0.943         | -0.446                                           |
| $[\text{Tp}]_2\text{LuSPh}$             | 2.726                      | 1.852          | -0.412         | -0.103                                           |
| $[\text{Tp}]_2\text{LuSePh}$            | 2.957                      | 1.824          | -0.335         | -0.070                                           |
| $[\text{Tp}]_2\text{LuTePh}$            | 3.130                      | 1.764          | -0.185         | -0.033                                           |

**Table 2.** Comparison of DFT calculated in-plane and out-of-plane Zr-E bond lengths in  $\text{Cp}_2\text{Zr}(\text{EH})_2$ . The calculations were performed with idealized Zr-O-H and Zr-E-H (E = S, Se, Te) bond angles of  $120^\circ$  and  $90^\circ$ , respectively.

|    | $d(\text{Zr-E})/\text{\AA}$<br>for<br>E-Zr-E-H =<br>$90^\circ$ | $d(\text{Zr-E})/\text{\AA}$<br>for<br>E-Zr-E-H =<br>$0^\circ$ | $d(\text{Zr-E})/\text{\AA}$<br>for<br>E-Zr-E-H =<br>$180^\circ$ | $\Delta d/\text{\AA}$ | $\Delta d_{\text{av}}/\text{\AA}$ |
|----|----------------------------------------------------------------|---------------------------------------------------------------|-----------------------------------------------------------------|-----------------------|-----------------------------------|
| O  | 2.013                                                          | 2.013                                                         |                                                                 | 0.000                 | 0.004                             |
|    | 2.010                                                          |                                                               | 2.018                                                           | 0.008                 |                                   |
| S  | 2.536                                                          | 2.599                                                         |                                                                 | 0.063                 | 0.065                             |
|    | 2.522                                                          |                                                               | 2.589                                                           | 0.067                 |                                   |
| Se | 2.704                                                          | 2.793                                                         |                                                                 | 0.089                 | 0.084                             |
|    | 2.693                                                          |                                                               | 2.771                                                           | 0.078                 |                                   |
| Te | 2.905                                                          | 3.034                                                         |                                                                 | 0.129                 | 0.118                             |
|    | 2.892                                                          |                                                               | 2.998                                                           | 0.106                 |                                   |

**Table 3.** Crystal, intensity collection and refinement data.

|                                          | [Tm <sup>Bu<sup>t</sup></sup> ]CdMe                                                | [Tm <sup>Bu<sup>t</sup></sup> ]CdI                                |
|------------------------------------------|------------------------------------------------------------------------------------|-------------------------------------------------------------------|
| lattice                                  | Triclinic                                                                          | Monoclinic                                                        |
| formula                                  | C <sub>24</sub> H <sub>42</sub> BCdN <sub>6</sub> O <sub>0.50</sub> S <sub>3</sub> | C <sub>21</sub> H <sub>34</sub> BCdIN <sub>6</sub> S <sub>3</sub> |
| formula weight                           | 642.03                                                                             | 716.83                                                            |
| space group                              | P-1                                                                                | P2 <sub>1</sub> /n                                                |
| <i>a</i> /Å                              | 10.8046(7)                                                                         | 10.7361(6)                                                        |
| <i>b</i> /Å                              | 12.3830(8)                                                                         | 16.8058(9)                                                        |
| <i>c</i> /Å                              | 14.3266(9)                                                                         | 16.252(1)                                                         |
| $\alpha$ /°                              | 89.976(1)                                                                          | 90.00                                                             |
| $\beta$ /°                               | 69.697(1)                                                                          | 90.286(1)                                                         |
| $\gamma$ /°                              | 64.505(1)                                                                          | 90.00                                                             |
| <i>V</i> /Å <sup>3</sup>                 | 1597.35(18)                                                                        | 2932.3(3)                                                         |
| <i>Z</i>                                 | 2                                                                                  | 4                                                                 |
| temperature (K)                          | 243                                                                                | 243                                                               |
| radiation ( $\lambda$ , Å)               | 0.71073                                                                            | 0.71073                                                           |
| $\rho$ (calcd.), g cm <sup>-3</sup>      | 1.335                                                                              | 1.624                                                             |
| $\mu$ (Mo K $\alpha$ ), mm <sup>-1</sup> | 0.904                                                                              | 2.032                                                             |
| $\theta$ max, deg.                       | 28.12                                                                              | 28.31                                                             |
| no. of data                              | 6931                                                                               | 6673                                                              |
| no. of parameters                        | 360                                                                                | 303                                                               |
| <i>R</i> <sub>1</sub>                    | 0.0322                                                                             | 0.0270                                                            |
| <i>wR</i> <sub>2</sub>                   | 0.0839                                                                             | 0.0635                                                            |
| GOF                                      | 1.017                                                                              | 1.042                                                             |

**Table 3.** Crystal, intensity collection and refinement data (continued).

|                                          | [Tm <sup>Bu<sup>t</sup></sup> ]CdOC <sub>6</sub> H <sub>3</sub> Ph <sub>2</sub> | [Tm <sup>Bu<sup>t</sup></sup> ]CdSPh                             |
|------------------------------------------|---------------------------------------------------------------------------------|------------------------------------------------------------------|
| lattice                                  | Monoclinic                                                                      | Monoclinic                                                       |
| formula                                  | C <sub>46</sub> H <sub>55</sub> BCdN <sub>6</sub> OS <sub>3</sub>               | C <sub>27</sub> H <sub>39</sub> BCdN <sub>6</sub> S <sub>4</sub> |
| formula weight                           | 927.35                                                                          | 699.09                                                           |
| space group                              | P2 <sub>1</sub> /c                                                              | P2 <sub>1</sub> /c                                               |
| <i>a</i> /Å                              | 22.379(3)                                                                       | 10.2408(7)                                                       |
| <i>b</i> /Å                              | 10.827(1)                                                                       | 32.833(2)                                                        |
| <i>c</i> /Å                              | 21.656(3)                                                                       | 10.4732(7)                                                       |
| $\alpha$ /°                              | 90.00                                                                           | 90.00                                                            |
| $\beta$ /°                               | 118.560(3)                                                                      | 112.149(1)                                                       |
| $\gamma$ /°                              | 90.00                                                                           | 90.00                                                            |
| <i>V</i> /Å <sup>3</sup>                 | 4608.8(10)                                                                      | 3261.6(4)                                                        |
| <i>Z</i>                                 | 4                                                                               | 4                                                                |
| temperature (K)                          | 243                                                                             | 243                                                              |
| radiation ( $\lambda$ , Å)               | 0.71073                                                                         | 0.71073                                                          |
| $\rho$ (calcd.), g cm <sup>-3</sup>      | 1.336                                                                           | 1.424                                                            |
| $\mu$ (Mo K $\alpha$ ), mm <sup>-1</sup> | 0.651                                                                           | 0.953                                                            |
| $\theta$ max, deg.                       | 23.26                                                                           | 28.31                                                            |
| no. of data                              | 5652                                                                            | 7468                                                             |
| no. of parameters                        | 515                                                                             | 357                                                              |
| <i>R</i> <sub>1</sub>                    | 0.0588                                                                          | 0.0312                                                           |
| <i>wR</i> <sub>2</sub>                   | 0.0804                                                                          | 0.0721                                                           |
| GOF                                      | 1.017                                                                           | 1.002                                                            |

**Table 3.** Crystal, intensity collection and refinement data (continued).

|                                          | [Tm <sup>But</sup> ]CdSC <sub>6</sub> H <sub>4</sub> Me          | [Tm <sup>But</sup> ]CdSePh                                          |
|------------------------------------------|------------------------------------------------------------------|---------------------------------------------------------------------|
| lattice                                  | Monoclinic                                                       | Monoclinic                                                          |
| formula                                  | C <sub>37</sub> H <sub>50</sub> BCdN <sub>6</sub> S <sub>4</sub> | C <sub>27</sub> H <sub>39</sub> BCdN <sub>6</sub> S <sub>3</sub> Se |
| formula weight                           | 830.28                                                           | 745.99                                                              |
| space group                              | P2 <sub>1</sub> /n                                               | P2 <sub>1</sub> /c                                                  |
| <i>a</i> /Å                              | 15.0659(9)                                                       | 10.4001(6)                                                          |
| <i>b</i> /Å                              | 10.9688(6)                                                       | 32.699(2)                                                           |
| <i>c</i> /Å                              | 25.434(2)                                                        | 10.6389(7)                                                          |
| $\alpha$ /°                              | 90.00                                                            | 90.00                                                               |
| $\beta$ /°                               | 104.608(1)                                                       | 113.717(1)                                                          |
| $\gamma$ /°                              | 90.00                                                            | 90.00                                                               |
| <i>V</i> /Å <sup>3</sup>                 | 4067.3(4)                                                        | 3312.4(4)                                                           |
| <i>Z</i>                                 | 4                                                                | 4                                                                   |
| temperature (K)                          | 243                                                              | 243                                                                 |
| radiation ( $\lambda$ , Å)               | 0.71073                                                          | 0.71073                                                             |
| $\rho$ (calcd.), g cm <sup>-3</sup>      | 1.356                                                            | 1.496                                                               |
| $\mu$ (Mo K $\alpha$ ), mm <sup>-1</sup> | 0.776                                                            | 1.974                                                               |
| $\theta$ max, deg.                       | 28.28                                                            | 28.29                                                               |
| no. of data                              | 9449                                                             | 7646                                                                |
| no. of parameters                        | 447                                                              | 357                                                                 |
| <i>R</i> <sub>1</sub>                    | 0.0480                                                           | 0.0419                                                              |
| <i>wR</i> <sub>2</sub>                   | 0.0538                                                           | 0.0620                                                              |
| GOF                                      | 1.002                                                            | 1.007                                                               |



**Table 3.** Crystal, intensity collection and refinement data (continued).

|                                          | [Tm <sup>Bu<sup>t</sup></sup> ]CdTePh                               | [Tm <sup>Bu<sup>t</sup></sup> ] <sub>2</sub> Cd                                 |
|------------------------------------------|---------------------------------------------------------------------|---------------------------------------------------------------------------------|
| lattice                                  | Monoclinic                                                          | Tetragonal                                                                      |
| formula                                  | C <sub>27</sub> H <sub>39</sub> BCdN <sub>6</sub> S <sub>3</sub> Te | C <sub>42</sub> H <sub>68</sub> B <sub>2</sub> CdN <sub>12</sub> S <sub>6</sub> |
| formula weight                           | 794.63                                                              | 1067.46                                                                         |
| space group                              | P2 <sub>1</sub> /c                                                  | I4 <sub>1</sub> /a                                                              |
| <i>a</i> /Å                              | 10.6859(6)                                                          | 19.7140(8)                                                                      |
| <i>b</i> /Å                              | 32.577(2)                                                           | 19.7140(8)                                                                      |
| <i>c</i> /Å                              | 10.8236(5)                                                          | 30.131(2)                                                                       |
| $\alpha$ /°                              | 90.00                                                               | 90.00                                                                           |
| $\beta$ /°                               | 115.5480(10)                                                        | 90.00                                                                           |
| $\gamma$ /°                              | 90.00                                                               | 90.00                                                                           |
| <i>V</i> /Å <sup>3</sup>                 | 3399.5(3)                                                           | 11710.2(9)                                                                      |
| <i>Z</i>                                 | 4                                                                   | 8                                                                               |
| temperature (K)                          | 243                                                                 | 243                                                                             |
| radiation ( $\lambda$ , Å)               | 0.71073                                                             | 0.71073                                                                         |
| $\rho$ (calcd.), g cm <sup>-3</sup>      | 1.553                                                               | 1.211                                                                           |
| $\mu$ (Mo K $\alpha$ ), mm <sup>-1</sup> | 1.694                                                               | 0.625                                                                           |
| $\theta$ max, deg.                       | 28.29                                                               | 28.25                                                                           |
| no. of data                              | 7931                                                                | 6946                                                                            |
| no. of parameters                        | 357                                                                 | 290                                                                             |
| <i>R</i> <sub>1</sub>                    | 0.0459                                                              | 0.0566                                                                          |
| <i>wR</i> <sub>2</sub>                   | 0.0940                                                              | 0.1937                                                                          |
| GOF                                      | 1.020                                                               | 1.065                                                                           |

**Table 4.** Cartesian Coordinated for Geometry Optimized Structures

| <b>[Tm<sup>Bu<sup>t</sup></sup>]ZnOPh</b> |              |              |              |
|-------------------------------------------|--------------|--------------|--------------|
| <b>atom</b>                               | <b>x</b>     | <b>y</b>     | <b>z</b>     |
| Zn1                                       | -0.122191601 | 0.373557464  | -0.993570064 |
| S2                                        | 0.06501335   | -1.945644743 | -0.18344879  |
| S3                                        | 1.316516277  | 1.679927772  | 0.545823737  |
| S4                                        | 1.169706904  | 0.390313119  | -3.109457903 |
| O5                                        | -1.983334349 | 0.854136485  | -1.00899432  |
| C6                                        | -2.551103741 | 1.949149829  | -1.504821369 |
| C7                                        | -1.853431011 | 2.90633556   | -2.277885451 |
| C8                                        | -2.495980771 | 4.037947901  | -2.77702503  |
| C9                                        | -3.851282873 | 4.260171773  | -2.528233941 |
| C10                                       | -4.55504826  | 3.320495632  | -1.767864771 |
| C11                                       | -3.924168758 | 2.187480262  | -1.264847223 |
| B12                                       | 3.335426761  | -0.877205751 | -0.698392639 |
| N13                                       | 2.629932834  | -1.311670567 | 0.625106413  |
| N14                                       | 1.323923669  | -1.936061631 | 2.289169572  |
| N15                                       | 3.496159263  | 0.671321884  | -0.830454902 |
| N16                                       | 3.450668544  | 2.876594356  | -0.757996266 |
| N17                                       | 2.769104253  | -1.562720764 | -1.981394928 |
| N18                                       | 1.783371831  | -2.212656569 | -3.844841507 |
| C19                                       | 1.368371601  | -1.718338581 | 0.934161754  |
| C20                                       | 3.374290752  | -1.278909923 | 1.791928394  |

|     |              |              |              |
|-----|--------------|--------------|--------------|
| C21 | 2.579354044  | -1.657718562 | 2.816679406  |
| C22 | 0.128809273  | -2.338235337 | 3.119655961  |
| C23 | 0.550810797  | -2.422202831 | 4.597243628  |
| C24 | -0.360466784 | -3.728250252 | 2.675323091  |
| C25 | -0.969497164 | -1.266198605 | 2.987472377  |
| C26 | 2.785094038  | 1.738530312  | -0.369899435 |
| C27 | 4.603334496  | 1.148062234  | -1.510999284 |
| C28 | 4.581305742  | 2.498264422  | -1.472425393 |
| C29 | 3.062450437  | 4.31120521   | -0.491529705 |
| C30 | 1.719221509  | 4.617913511  | -1.17887785  |
| C31 | 4.135682586  | 5.239834639  | -1.087189764 |
| C32 | 3.00485298   | 4.550590441  | 1.028264898  |
| C33 | 1.919811868  | -1.164490433 | -2.968774402 |
| C34 | 3.154611204  | -2.866750935 | -2.240260854 |
| C35 | 2.55405995   | -3.271952049 | -3.380875581 |
| C36 | 0.943898905  | -2.264756377 | -5.098575257 |
| C37 | 1.106865605  | -3.648056993 | -5.752667251 |
| C38 | -0.53970991  | -2.070803907 | -4.733081543 |
| C39 | 1.440350595  | -1.19723418  | -6.090609562 |
| H40 | -0.79641151  | 2.748052267  | -2.486510671 |
| H41 | -1.928257852 | 4.75328557   | -3.369864968 |
| H42 | -4.34944526  | 5.143492835  | -2.918915688 |
| H43 | -5.613061737 | 3.474567067  | -1.562818227 |

|     |              |              |              |
|-----|--------------|--------------|--------------|
| H44 | -4.471293913 | 1.456744964  | -0.674849433 |
| H45 | 4.462587562  | -1.296381738 | -0.598529054 |
| H46 | 4.412262821  | -0.98830005  | 1.787310878  |
| H47 | 2.806482828  | -1.755604632 | 3.862258566  |
| H48 | 0.886128214  | -1.456419116 | 4.988087367  |
| H49 | 1.331994074  | -3.170722006 | 4.765667049  |
| H50 | -0.32352715  | -2.724243677 | 5.179955878  |
| H51 | -0.69278146  | -3.723828791 | 1.637154961  |
| H52 | -1.201828455 | -4.030958728 | 3.307029745  |
| H53 | 0.436574094  | -4.471129785 | 2.788772225  |
| H54 | -1.339625421 | -1.187903779 | 1.965276548  |
| H55 | -0.588332928 | -0.287904701 | 3.297724575  |
| H56 | -1.808163631 | -1.530369469 | 3.639949868  |
| H57 | 5.315656102  | 0.477251043  | -1.962975115 |
| H58 | 5.274615142  | 3.208323667  | -1.88413903  |
| H59 | 0.907166155  | 4.01033136   | -0.780174872 |
| H60 | 1.793108638  | 4.440368721  | -2.256798303 |
| H61 | 1.469495223  | 5.672417046  | -1.022832871 |
| H62 | 5.118997144  | 5.087767284  | -0.63023011  |
| H63 | 3.836805319  | 6.271805481  | -0.885042683 |
| H64 | 4.221877659  | 5.131258079  | -2.172915712 |
| H65 | 3.974728192  | 4.333186626  | 1.488932262  |
| H66 | 2.242594663  | 3.933502233  | 1.504403726  |

|     |              |              |              |
|-----|--------------|--------------|--------------|
| H67 | 2.765667625  | 5.602127718  | 1.216705885  |
| H68 | 3.832904087  | -3.391373008 | -1.587168642 |
| H69 | 2.61670228   | -4.214710154 | -3.892358026 |
| H70 | 0.756986186  | -4.457124507 | -5.103928372 |
| H71 | 2.140442856  | -3.847945647 | -6.053599791 |
| H72 | 0.493311068  | -3.666086855 | -6.657323431 |
| H73 | -0.723889903 | -1.088178462 | -4.299332663 |
| H74 | -0.862004008 | -2.835191504 | -4.018649565 |
| H75 | -1.147348579 | -2.169020396 | -5.638559318 |
| H76 | 1.331941603  | -0.190671557 | -5.686183988 |
| H77 | 0.85417135   | -1.264172022 | -7.01279849  |
| H78 | 2.493126474  | -1.365651772 | -6.342182719 |

$[\text{Tm}^{\text{Bu}^t}]\text{ZnSPh}$ 

| atom | x            | y            | z            |
|------|--------------|--------------|--------------|
| Zn1  | -0.326672378 | -0.119784929 | 0.476361907  |
| S2   | 0.727645766  | 0.413032999  | 2.670588355  |
| S3   | -0.351955079 | 2.096272853  | -0.672437925 |
| S4   | 1.480740157  | -1.303722343 | -0.763153066 |
| S5   | -2.392638896 | -1.182176177 | 0.78637734   |
| C6   | -2.873620991 | -1.495497443 | -0.91270779  |
| C7   | -3.966810815 | -0.812470825 | -1.472317676 |
| C8   | -4.377543629 | -1.07083213  | -2.780424026 |
| C9   | -3.705165887 | -2.01354786  | -3.560864603 |
| C10  | -2.619473502 | -2.700446187 | -3.014060243 |
| C11  | -2.210810669 | -2.45021496  | -1.703477589 |
| B12  | 2.962859269  | 1.651185262  | 0.311963985  |
| N13  | 2.156908463  | 2.412134565  | 1.410672774  |
| N14  | 0.826193379  | 3.171187897  | 2.996928755  |
| N15  | 2.365248458  | 1.822972326  | -1.119729924 |
| N16  | 1.201274979  | 2.117629598  | -2.970714517 |
| N17  | 3.311282117  | 0.175697469  | 0.682082486  |
| N18  | 3.513049711  | -1.998746604 | 0.993334519  |
| C19  | 1.238751354  | 2.03566538   | 2.342796525  |
| C20  | 2.313353418  | 3.785380539  | 1.482407439  |

|     |              |              |              |
|-----|--------------|--------------|--------------|
| C21 | 1.49922682   | 4.258114912  | 2.451182626  |
| C22 | -0.212000664 | 3.285635898  | 4.086414508  |
| C23 | -0.354012221 | 4.764710786  | 4.487375639  |
| C24 | -1.570548755 | 2.794675469  | 3.552228441  |
| C25 | 0.249299491  | 2.490090661  | 5.320863041  |
| C26 | 1.104300135  | 2.000892804  | -1.604960144 |
| C27 | 3.245076512  | 1.811604799  | -2.188442146 |
| C28 | 2.538784479  | 1.99029956   | -3.326168686 |
| C29 | 0.083336664  | 2.336906747  | -3.961630435 |
| C30 | -0.599763249 | 3.684758137  | -3.664666384 |
| C31 | -0.904578239 | 1.158205069  | -3.896608327 |
| C32 | 0.676145876  | 2.397917502  | -5.381034528 |
| C33 | 2.78895858   | -1.033602989 | 0.337425223  |
| C34 | 4.355776149  | -0.037601333 | 1.564928668  |
| C35 | 4.484266173  | -1.368021416 | 1.762454985  |
| C36 | 3.30099695   | -3.492515814 | 0.960844626  |
| C37 | 1.896243518  | -3.825535253 | 1.497622054  |
| C38 | 4.341494179  | -4.166188005 | 1.872800318  |
| C39 | 3.509110778  | -4.006434953 | -0.475762889 |
| H40 | -4.489482871 | -0.075282132 | -0.870207656 |
| H41 | -5.226879582 | -0.529916227 | -3.191704069 |
| H42 | -4.025495737 | -2.212984702 | -4.580217207 |
| H43 | -2.08978502  | -3.442520694 | -3.607188655 |

|     |              |              |              |
|-----|--------------|--------------|--------------|
| H44 | -1.37523045  | -2.999792526 | -1.279556483 |
| H45 | 4.029258431  | 2.215183384  | 0.268402136  |
| H46 | 2.998114476  | 4.306727133  | 0.833692189  |
| H47 | 1.353725518  | 5.265641418  | 2.794619567  |
| H48 | 0.577530185  | 5.179870328  | 4.885532998  |
| H49 | -1.105573894 | 4.828075599  | 5.278599313  |
| H50 | -0.699989416 | 5.387496671  | 3.656666932  |
| H51 | -1.543241671 | 1.738720985  | 3.284864169  |
| H52 | -1.86541614  | 3.371184077  | 2.669717583  |
| H53 | -2.332534087 | 2.936411756  | 4.325417899  |
| H54 | 0.352958775  | 1.42832094   | 5.097385756  |
| H55 | -0.490287178 | 2.605912047  | 6.119558694  |
| H56 | 1.20936688   | 2.870004329  | 5.686489724  |
| H57 | 4.305090479  | 1.684986843  | -2.040898774 |
| H58 | 2.879446288  | 2.047180783  | -4.343336812 |
| H59 | -1.054679975 | 3.694435521  | -2.674025987 |
| H60 | -1.384132432 | 3.861758377  | -4.407492182 |
| H61 | 0.123483321  | 4.504920334  | -3.729821064 |
| H62 | -1.3894963   | 1.084125024  | -2.923948055 |
| H63 | -0.391327068 | 0.213799083  | -4.101967424 |
| H64 | -1.679254905 | 1.297764707  | -4.6572206   |
| H65 | 1.384142417  | 3.224246685  | -5.502328991 |
| H66 | -0.145906371 | 2.565948196  | -6.081686268 |



|     |             |              |              |
|-----|-------------|--------------|--------------|
| H67 | 1.163479891 | 1.460800616  | -5.667320833 |
| H68 | 4.924508649 | 0.783560794  | 1.969560977  |
| H69 | 5.186486648 | -1.906719321 | 2.371213041  |
| H70 | 1.111986416 | -3.403536733 | 0.869866567  |
| H71 | 1.773062106 | -3.440715176 | 2.514935154  |
| H72 | 1.772202355 | -4.912923429 | 1.524717679  |
| H73 | 5.368447238 | -3.979008743 | 1.542938975  |
| H74 | 4.176147985 | -5.245898986 | 1.83113839   |
| H75 | 4.23685042  | -3.85872962  | 2.917750142  |
| H76 | 4.518171556 | -3.766514491 | -0.827725479 |
| H77 | 2.78458426  | -3.573378979 | -1.165587746 |
| H78 | 3.392627158 | -5.094820337 | -0.48894475  |

**[Tm<sup>Bu<sup>t</sup></sup>]ZnSePh**

| <b>atom</b> | <b>x</b>    | <b>y</b>    | <b>z</b>    |
|-------------|-------------|-------------|-------------|
| Zn1         | 2.928583214 | 4.219128674 | 9.007346527 |
| Se2         | 0.884398615 | 5.171041497 | 10.093938   |
| S3          | 4.111783519 | 2.604266264 | 10.49424583 |
| S4          | 4.748121813 | 5.783894749 | 8.349244771 |
| S5          | 2.600628182 | 2.892730201 | 6.914481524 |
| N6          | 6.410141692 | 3.048001287 | 9.024174553 |
| N7          | 6.647257954 | 3.507768573 | 11.16911429 |
| N8          | 5.713132355 | 3.842370621 | 6.632314335 |
| N9          | 5.205999962 | 5.732125029 | 5.61342051  |
| N10         | 4.917250058 | 1.514409949 | 7.524212257 |
| N11         | 3.143787379 | 0.210220798 | 7.37571159  |
| B12         | 6.005055204 | 2.632874462 | 7.574039273 |
| H13         | 6.995822828 | 2.118258713 | 7.115084117 |
| C14         | 5.756478353 | 3.069188241 | 10.218761   |
| C15         | 7.708539713 | 3.480830874 | 9.231224079 |
| H16         | 8.415080753 | 3.542864712 | 8.419833312 |
| C17         | 7.860740694 | 3.766817281 | 10.54285638 |
| H18         | 8.725914307 | 4.120572432 | 11.07234783 |
| C19         | 6.399985484 | 3.710260591 | 12.64400994 |
| C20         | 7.69640036  | 4.210972725 | 13.30546998 |

|     |             |             |             |
|-----|-------------|-------------|-------------|
| H21 | 8.018525183 | 5.177824325 | 12.90665098 |
| H22 | 8.516214752 | 3.491434567 | 13.21228098 |
| H23 | 7.499344776 | 4.346646496 | 14.37206526 |
| C24 | 5.309721748 | 4.779751925 | 12.84075628 |
| H25 | 5.607188154 | 5.721168505 | 12.36804426 |
| H26 | 5.174397371 | 4.96087659  | 13.91190949 |
| H27 | 4.355213044 | 4.464832886 | 12.41993443 |
| C28 | 6.016225629 | 2.365095212 | 13.28793912 |
| H29 | 5.091334444 | 1.968389574 | 12.86905367 |
| H30 | 5.875481794 | 2.508922034 | 14.3639864  |
| H31 | 6.814072789 | 1.628730235 | 13.14341854 |
| C32 | 5.227688176 | 5.099273055 | 6.832531755 |
| C33 | 5.984160542 | 3.690358916 | 5.283514679 |
| H34 | 6.380664407 | 2.768196652 | 4.891250991 |
| C35 | 5.673497004 | 4.843876659 | 4.652290468 |
| H36 | 5.755399673 | 5.100520774 | 3.61241853  |
| C37 | 4.743859083 | 7.137204134 | 5.310513915 |
| C38 | 4.906669357 | 7.403862765 | 3.803392754 |
| H39 | 4.576508214 | 8.426922235 | 3.605475592 |
| H40 | 4.287229081 | 6.737114244 | 3.195707689 |
| H41 | 5.948644675 | 7.326290449 | 3.476260154 |
| C42 | 5.625791249 | 8.139200679 | 6.078136208 |
| H43 | 5.316811205 | 9.158073036 | 5.82353964  |

|     |              |              |             |
|-----|--------------|--------------|-------------|
| H44 | 6.677553965  | 8.020618614  | 5.796015076 |
| H45 | 5.534061576  | 8.010865881  | 7.156829796 |
| C46 | 3.254523158  | 7.280967867  | 5.671253574 |
| H47 | 2.913725088  | 8.28271291   | 5.390872479 |
| H48 | 3.078403934  | 7.145753384  | 6.737623566 |
| H49 | 2.651369651  | 6.550096666  | 5.12396356  |
| C50 | 3.575456035  | 1.512128851  | 7.288862858 |
| C51 | 5.319463221  | 0.211613388  | 7.762157449 |
| H52 | 6.349350564  | -0.028029475 | 7.970525288 |
| C53 | 4.237684336  | -0.593085891 | 7.67512933  |
| H54 | 4.163158857  | -1.658265096 | 7.793157341 |
| C55 | 1.735033935  | -0.307887342 | 7.218317133 |
| C56 | 0.835788796  | 0.313491577  | 8.303329497 |
| H57 | 1.216897255  | 0.07200301   | 9.300612636 |
| H58 | -0.174348938 | -0.099012755 | 8.212756302 |
| H59 | 0.777066571  | 1.397377333  | 8.208243741 |
| C60 | 1.738420655  | -1.835086504 | 7.407844677 |
| H61 | 2.356280258  | -2.345623461 | 6.662115561 |
| H62 | 0.712771291  | -2.192275961 | 7.283582942 |
| H63 | 2.067602706  | -2.12726417  | 8.409746447 |
| C64 | 1.229765676  | 0.001310679  | 5.796995869 |
| H65 | 1.87954117   | -0.464513722 | 5.048283774 |
| H66 | 1.190493668  | 1.074285059  | 5.609309884 |

|     |              |              |             |
|-----|--------------|--------------|-------------|
| H67 | 0.222037865  | -0.409277555 | 5.676969208 |
| C68 | 0.101826265  | 6.043646968  | 8.51059344  |
| C69 | -0.011212105 | 7.440117985  | 8.467666026 |
| H70 | 0.36876868   | 8.030333359  | 9.296127402 |
| C71 | -0.606572014 | 8.072162294  | 7.373717859 |
| H72 | -0.688605255 | 9.156763736  | 7.36197411  |
| C73 | -1.092498535 | 7.322091721  | 6.300732058 |
| H74 | -1.555053664 | 7.81511321   | 5.449771149 |
| C75 | -0.983784431 | 5.930632431  | 6.338142153 |
| H76 | -1.362911657 | 5.331673934  | 5.513259956 |
| C77 | -0.398193231 | 5.295208968  | 7.435457134 |
| H78 | -0.331609155 | 4.211868163  | 7.460912183 |

**[Tm<sup>Bu<sup>t</sup></sup>]ZnTePh**

| <b>atom</b> | <b>x</b>     | <b>y</b>     | <b>z</b>     |
|-------------|--------------|--------------|--------------|
| Zn1         | -1.539424641 | -0.815322979 | -0.343698353 |
| Te2         | -4.188981724 | -1.129950703 | -0.660794575 |
| S3          | -0.222672046 | -2.886920215 | -0.842504696 |
| S4          | -0.769232998 | -0.21545896  | 1.961398018  |
| S5          | -0.350267204 | 0.866536063  | -1.744184048 |
| B6          | 2.177025538  | -0.569193496 | 0.159564772  |
| N7          | 2.02315104   | -1.313288564 | -1.205468342 |
| N8          | 1.551607339  | -2.572605606 | -2.954845342 |
| N9          | 1.660638184  | -1.392655697 | 1.379906788  |
| N10         | 0.627506962  | -2.334389687 | 3.086403942  |
| N11         | 1.673593072  | 0.906838298  | 0.13601019   |
| N12         | 0.738257399  | 2.880240599  | -0.179232662 |
| C13         | 1.144234401  | -2.237145096 | -1.684895599 |
| C14         | 2.970500289  | -1.06407141  | -2.18315024  |
| C15         | 2.687427779  | -1.830618151 | -3.258942951 |
| C16         | 0.919522989  | -3.568700766 | -3.896064463 |
| C17         | 1.73274236   | -3.61448676  | -5.202052414 |
| C18         | 0.954673584  | -4.968725751 | -3.255820615 |
| C19         | -0.51447437  | -3.120680111 | -4.232911342 |
| C20         | 0.529977221  | -1.345052107 | 2.13753677   |

|     |              |              |              |
|-----|--------------|--------------|--------------|
| C21 | 2.461023691  | -2.416746345 | 1.855482018  |
| C22 | 1.832905833  | -3.000943678 | 2.899258817  |
| C23 | -0.385865442 | -2.703496391 | 4.141815304  |
| C24 | 0.158811093  | -3.881180184 | 4.969773951  |
| C25 | -1.693378082 | -3.151322595 | 3.463093842  |
| C26 | -0.602440354 | -1.506101802 | 5.085878844  |
| C27 | 0.709326683  | 1.562890499  | -0.567562085 |
| C28 | 2.302030472  | 1.818695711  | 0.966012213  |
| C29 | 1.732649987  | 3.030096678  | 0.780146818  |
| C30 | -0.140976575 | 4.006493372  | -0.667062775 |
| C31 | 0.074327328  | 4.199612943  | -2.179556728 |
| C32 | 0.266227034  | 5.305039048  | 0.051230111  |
| C33 | -1.611333191 | 3.703977267  | -0.324599223 |
| C34 | -4.721209844 | 0.78460767   | 0.184170211  |
| C35 | -5.316103807 | 1.768542345  | -0.618577654 |
| C36 | -5.704052321 | 2.996099362  | -0.074680757 |
| C37 | -5.500068097 | 3.265318854  | 1.279796805  |
| C38 | -4.909786956 | 2.291135661  | 2.087350905  |
| C39 | -4.530038118 | 1.059382906  | 1.547296368  |
| H40 | 3.369085551  | -0.484831709 | 0.329194458  |
| H41 | 3.771152477  | -0.360895197 | -2.02221331  |
| H42 | 3.202089172  | -1.910556453 | -4.19846051  |
| H43 | 1.72809108   | -2.654504135 | -5.727464968 |

|     |              |              |              |
|-----|--------------|--------------|--------------|
| H44 | 1.267296209  | -4.350620082 | -5.862800833 |
| H45 | 2.767954452  | -3.930137697 | -5.036935675 |
| H46 | 0.375787172  | -5.00306251  | -2.332668206 |
| H47 | 1.98636084   | -5.264721269 | -3.036927854 |
| H48 | 0.532663744  | -5.695774631 | -3.957088774 |
| H49 | -0.507342038 | -2.124527324 | -4.686619402 |
| H50 | -1.146257467 | -3.094811998 | -3.345422003 |
| H51 | -0.950909098 | -3.822482127 | -4.95105542  |
| H52 | 3.415476088  | -2.637784677 | 1.406188448  |
| H53 | 2.147556011  | -3.820630908 | 3.518423973  |
| H54 | 1.090877151  | -3.630842798 | 5.486696677  |
| H55 | 0.31326488   | -4.778481923 | 4.362515042  |
| H56 | -0.583455157 | -4.127635814 | 5.733556797  |
| H57 | -2.14489373  | -2.348024953 | 2.881548028  |
| H58 | -2.406304585 | -3.466394157 | 4.231909965  |
| H59 | -1.507685086 | -4.001157455 | 2.798552615  |
| H60 | -1.006464924 | -0.644153208 | 4.554746191  |
| H61 | 0.340518334  | -1.217013042 | 5.562427419  |
| H62 | -1.30882011  | -1.791594153 | 5.872113373  |
| H63 | 3.106179939  | 1.521371577  | 1.61908346   |
| H64 | 1.959284717  | 3.973124625  | 1.24234502   |
| H65 | -0.214342027 | 3.311535088  | -2.742313339 |
| H66 | 1.12416714   | 4.428203766  | -2.393422153 |



|     |              |             |              |
|-----|--------------|-------------|--------------|
| H67 | -0.535362177 | 5.040878262 | -2.524417179 |
| H68 | 1.302974119  | 5.589566657 | -0.156208504 |
| H69 | 0.118898384  | 5.242768576 | 1.133945798  |
| H70 | -0.374741681 | 6.109046552 | -0.319904741 |
| H71 | -1.975421962 | 2.816150585 | -0.839598081 |
| H72 | -2.231111423 | 4.554486089 | -0.625939611 |
| H73 | -1.736477167 | 3.556451012 | 0.752436764  |
| H74 | -5.476203036 | 1.574732854 | -1.675510574 |
| H75 | -6.166061116 | 3.744009032 | -0.715474764 |
| H76 | -5.802478411 | 4.22038104  | 1.70191215   |
| H77 | -4.749209283 | 2.484605592 | 3.145610854  |
| H78 | -4.085025399 | 0.306617564 | 2.191393773  |

**[Tm<sup>Bu<sup>t</sup></sup>]CdOPh**

| <b>atom</b> | <b>x</b>     | <b>y</b>     | <b>z</b>     |
|-------------|--------------|--------------|--------------|
| Cd1         | -0.403479631 | 0.900894059  | 0.077116197  |
| S2          | -0.473097617 | -0.581645805 | -2.139720326 |
| S3          | 1.65220483   | 2.465838313  | -0.605386749 |
| S4          | 0.806621226  | -0.770817331 | 1.74912776   |
| O5          | -2.102695051 | 1.729671758  | 1.012897837  |
| B6          | 2.851678096  | -0.786494172 | -1.085932366 |
| N7          | 1.757432236  | -1.899252837 | -1.164322008 |
| N8          | 0.008534638  | -3.220042273 | -1.421455645 |
| N9          | 2.652535254  | 0.370730313  | -2.117016749 |
| N10         | 2.25800234   | 2.190992079  | -3.300730955 |
| N11         | 3.149910967  | -0.280838469 | 0.360997912  |
| N12         | 3.221584514  | 0.403560779  | 2.456738986  |
| C13         | 0.451870375  | -1.925448283 | -1.55373121  |
| C14         | 2.124823796  | -3.179769315 | -0.788468698 |
| C15         | 1.058233244  | -3.994423993 | -0.941489298 |
| C16         | -1.364434643 | -3.764305851 | -1.734557584 |
| C17         | -2.410150426 | -3.070355335 | -0.842163597 |
| C18         | -1.388987029 | -5.27164341  | -1.424431338 |
| C19         | -1.660789525 | -3.571220196 | -3.233075662 |
| C20         | 2.186132606  | 1.649574527  | -2.038253601 |

|     |              |              |              |
|-----|--------------|--------------|--------------|
| C21 | 3.002088943  | 0.114806792  | -3.431639322 |
| C22 | 2.761481233  | 1.224371118  | -4.163115102 |
| C23 | 1.863611893  | 3.581631391  | -3.738419621 |
| C24 | 2.130669596  | 3.728787203  | -5.247573391 |
| C25 | 2.725890931  | 4.617237567  | -2.99336216  |
| C26 | 0.358950621  | 3.791442485  | -3.490246633 |
| C27 | 2.422453368  | -0.190744501 | 1.509418754  |
| C28 | 4.40239349   | 0.260297155  | 0.595092985  |
| C29 | 4.45259107   | 0.68539276   | 1.876165355  |
| C30 | 2.860121141  | 0.762212352  | 3.878158816  |
| C31 | 4.069439307  | 1.4403999    | 4.546533987  |
| C32 | 1.68703443   | 1.760145691  | 3.872449306  |
| C33 | 2.526967312  | -0.519921928 | 4.662095141  |
| C34 | -2.952824381 | 2.580407232  | 0.44463272   |
| C35 | -3.04816531  | 2.769599838  | -0.954967485 |
| C36 | -3.957180042 | 3.671059001  | -1.505339314 |
| C37 | -4.807951897 | 4.41678886   | -0.687336745 |
| C38 | -4.731074213 | 4.237620987  | 0.697905805  |
| C39 | -3.827189171 | 3.340436982  | 1.257784641  |
| H40 | 3.868689046  | -1.334958242 | -1.435652481 |
| H41 | 3.121922703  | -3.398049894 | -0.442742189 |
| H42 | 0.965984544  | -5.047769596 | -0.751809953 |
| H43 | -2.46777741  | -2.00141019  | -1.044844898 |

|     |              |              |              |
|-----|--------------|--------------|--------------|
| H44 | -2.168080088 | -3.215393146 | 0.215486187  |
| H45 | -3.39354281  | -3.512049606 | -1.032228195 |
| H46 | -0.677308163 | -5.834932572 | -2.036439378 |
| H47 | -2.388941217 | -5.646466089 | -1.657914516 |
| H48 | -1.199825987 | -5.480279551 | -0.366950002 |
| H49 | -0.911624713 | -4.087688708 | -3.842760556 |
| H50 | -1.671355277 | -2.51625502  | -3.507558412 |
| H51 | -2.641697099 | -3.999063173 | -3.463471742 |
| H52 | 3.400247222  | -0.841266749 | -3.729737437 |
| H53 | 2.915313502  | 1.401443221  | -5.211291233 |
| H54 | 3.189475635  | 3.606401464  | -5.497508177 |
| H55 | 1.840119188  | 4.74027045   | -5.543231385 |
| H56 | 1.536166246  | 3.030493083  | -5.844650116 |
| H57 | 3.789085915  | 4.446241428  | -3.193771905 |
| H58 | 2.560290473  | 4.579104025  | -1.916702256 |
| H59 | 2.468945855  | 5.620325181  | -3.348500569 |
| H60 | 0.108609692  | 3.729651686  | -2.431551851 |
| H61 | -0.225233746 | 3.042387569  | -4.034411284 |
| H62 | 0.069803293  | 4.78196147   | -3.855474241 |
| H63 | 5.152002071  | 0.294398918  | -0.178550192 |
| H64 | 5.257418215  | 1.151536541  | 2.413752955  |
| H65 | 4.348322177  | 2.374307311  | 4.04893208   |
| H66 | 4.942960987  | 0.782257855  | 4.594847837  |

|     |              |              |              |
|-----|--------------|--------------|--------------|
| H67 | 3.789921464  | 1.68842696   | 5.573773264  |
| H68 | 1.943846912  | 2.649276428  | 3.287802774  |
| H69 | 1.478737306  | 2.074542244  | 4.900072678  |
| H70 | 0.781160587  | 1.317989537  | 3.45869727   |
| H71 | 1.665361659  | -1.03590739  | 4.238329999  |
| H72 | 2.298086764  | -0.256682293 | 5.699733482  |
| H73 | 3.383056703  | -1.203143072 | 4.663746126  |
| H74 | -2.403621361 | 2.183342806  | -1.610961387 |
| H75 | -4.002174384 | 3.788024137  | -2.586683142 |
| H76 | -5.51618815  | 5.119287558  | -1.117995426 |
| H77 | -5.385860411 | 4.809225553  | 1.353141952  |
| H78 | -3.768630114 | 3.20262207   | 2.334061734  |

$[\text{Tm}^{\text{Bu}^t}]\text{CdSPh}$ 

| atom | x            | y            | z            |
|------|--------------|--------------|--------------|
| Cd1  | 1.56534257   | 4.274383908  | -0.562210003 |
| S2   | 1.370268832  | 2.792675104  | -2.797614336 |
| S3   | 3.598181655  | 5.869776507  | -1.266776363 |
| S4   | 2.987661459  | 2.535200233  | 0.91789902   |
| S5   | -0.584599615 | 5.257737259  | 0.311853828  |
| B6   | 4.783033712  | 2.68925573   | -2.079758252 |
| H7   | 5.77921814   | 2.207105943  | -2.561908188 |
| N8   | 3.734004668  | 1.53446835   | -2.110585501 |
| N9   | 2.021564634  | 0.150470066  | -2.244440679 |
| N10  | 4.436746492  | 3.892944777  | -3.011147084 |
| N11  | 3.91617249   | 5.784035508  | -4.023355321 |
| N12  | 5.210344302  | 3.102867959  | -0.635131955 |
| N13  | 5.528493221  | 3.483129101  | 1.514538497  |
| C14  | 2.396859096  | 1.469128923  | -2.362960188 |
| C15  | 4.188866888  | 0.257408461  | -1.830183042 |
| H16  | 5.225021732  | 0.068649178  | -1.600951472 |
| C17  | 3.144869772  | -0.595794918 | -1.906938335 |
| H18  | 3.115891236  | -1.659322826 | -1.758278818 |
| C19  | 0.642232755  | -0.437042921 | -2.411314602 |
| C20  | -0.304480042 | 0.171556223  | -1.360273449 |

|     |              |              |              |
|-----|--------------|--------------|--------------|
| H21 | -0.418425747 | 1.246910781  | -1.495495071 |
| H22 | 0.073994345  | -0.016750367 | -0.350308067 |
| H23 | -1.290228771 | -0.296391298 | -1.450086281 |
| C24 | 0.710485667  | -1.957358001 | -2.178874563 |
| H25 | 1.360043147  | -2.460624791 | -2.902271462 |
| H26 | -0.296640071 | -2.363194605 | -2.306156019 |
| H27 | 1.038459064  | -2.207561608 | -1.165130154 |
| C28 | 0.150060015  | -0.18886882  | -3.849037631 |
| H29 | 0.833570924  | -0.645796445 | -4.572810482 |
| H30 | 0.06868882   | 0.876231683  | -4.066662028 |
| H31 | -0.836551961 | -0.646395424 | -3.975337497 |
| C32 | 3.986024682  | 5.161780442  | -2.798620531 |
| C33 | 4.641435734  | 3.725644388  | -4.369749974 |
| H34 | 4.999052326  | 2.792053587  | -4.772243712 |
| C35 | 4.322255844  | 4.878742362  | -4.996692847 |
| H36 | 4.355320873  | 5.123143406  | -6.042318764 |
| C37 | 3.48953554   | 7.202277596  | -4.318608905 |
| C38 | 3.580505726  | 7.446879747  | -5.835583653 |
| H39 | 4.600958774  | 7.334095008  | -6.216092654 |
| H40 | 3.271003868  | 8.477310379  | -6.029092291 |
| H41 | 2.910186969  | 6.792339982  | -6.40133253  |
| C42 | 4.449263755  | 8.178329785  | -3.612551996 |
| H43 | 5.478403266  | 8.019436219  | -3.952892566 |

|     |             |             |              |
|-----|-------------|-------------|--------------|
| H44 | 4.415000366 | 8.061432968 | -2.529086566 |
| H45 | 4.163084876 | 9.205822303 | -3.859456658 |
| C46 | 2.027964029 | 7.408233462 | -3.881610629 |
| H47 | 1.904455152 | 7.289459228 | -2.806076951 |
| H48 | 1.366462695 | 6.698893964 | -4.388241456 |
| H49 | 1.712238425 | 8.420459137 | -4.153541857 |
| C50 | 4.60596107  | 3.057518605 | 0.585809185  |
| C51 | 6.502041564 | 3.570274981 | -0.466302732 |
| H52 | 7.169133346 | 3.69012339  | -1.304361723 |
| C53 | 6.704173165 | 3.80737122  | 0.847484452  |
| H54 | 7.579847396 | 4.171906025 | 1.351772508  |
| C55 | 5.360987381 | 3.578215982 | 3.010688422  |
| C56 | 6.67446599  | 4.085861506 | 3.633232548  |
| H57 | 6.940762838 | 5.086993952 | 3.280421419  |
| H58 | 7.512413052 | 3.405265506 | 3.45103501   |
| H59 | 6.532892093 | 4.147520472 | 4.715499188  |
| C60 | 4.245899212 | 4.586710408 | 3.341898795  |
| H61 | 4.481866701 | 5.569314997 | 2.920993738  |
| H62 | 4.165904485 | 4.688982828 | 4.428978577  |
| H63 | 3.281623994 | 4.261186597 | 2.952333523  |
| C64 | 5.064657693 | 2.178515192 | 3.580126594  |
| H65 | 4.131131544 | 1.774624586 | 3.187375784  |
| H66 | 4.984266809 | 2.242900331 | 4.670082311  |



|     |              |             |              |
|-----|--------------|-------------|--------------|
| H67 | 5.878329594  | 1.486105176 | 3.338335182  |
| C68 | -1.209950382 | 6.001930848 | -1.199480921 |
| C69 | -1.593396626 | 5.222630257 | -2.305836171 |
| H70 | -1.487098828 | 4.142738254 | -2.254699471 |
| C71 | -2.107222663 | 5.819146396 | -3.45882096  |
| H72 | -2.393218798 | 5.193444145 | -4.301265725 |
| C73 | -2.263664283 | 7.205338749 | -3.531608938 |
| H74 | -2.670154654 | 7.667959721 | -4.42708418  |
| C75 | -1.897681853 | 7.987695398 | -2.43342053  |
| H76 | -2.018029039 | 9.068114432 | -2.470570413 |
| C77 | -1.37497029  | 7.395509535 | -1.282601686 |
| H78 | -1.088954441 | 8.009289995 | -0.433547427 |

**[Tm<sup>Bu<sup>t</sup></sup>]CdSePh**

| <b>atom</b> | <b>x</b>    | <b>y</b>    | <b>z</b>    |
|-------------|-------------|-------------|-------------|
| Cd1         | 2.533467542 | 12.0988281  | 9.122431378 |
| Se2         | 0.25644536  | 11.12605365 | 10.08324953 |
| S3          | 2.438165124 | 13.5573217  | 6.86436274  |
| S4          | 4.609821938 | 10.52005509 | 8.489731518 |
| S5          | 3.911504367 | 13.85769855 | 10.63023426 |
| B6          | 5.824214789 | 13.69006419 | 7.706449257 |
| H7          | 6.833870626 | 14.17907014 | 7.260608577 |
| N8          | 4.76476491  | 14.83679053 | 7.642022493 |
| N9          | 3.045658485 | 16.20514865 | 7.446999789 |
| N10         | 5.520691934 | 12.48186375 | 6.766764778 |
| N11         | 5.033139348 | 10.58671817 | 5.746429583 |
| N12         | 6.193121077 | 13.28036853 | 9.170140685 |
| N13         | 6.422277451 | 12.90976297 | 11.33549331 |
| C14         | 3.437213795 | 14.89030983 | 7.338662903 |
| C15         | 5.197519254 | 16.11770016 | 7.938719499 |
| H16         | 6.221818448 | 16.31588249 | 8.207432692 |
| C17         | 4.149179215 | 16.96114848 | 7.825953058 |
| H18         | 4.104302245 | 18.02312828 | 7.97935996  |
| C19         | 1.667551237 | 16.77968408 | 7.231449267 |
| C20         | 0.687335745 | 16.14614762 | 8.236100011 |

|     |              |             |             |
|-----|--------------|-------------|-------------|
| H21 | 1.020886525  | 16.32852048 | 9.26235973  |
| H22 | 0.595468438  | 15.07096687 | 8.085480421 |
| H23 | -0.300471703 | 16.60014081 | 8.110308341 |
| C24 | 1.709297896  | 18.29748745 | 7.485785461 |
| H25 | 2.384127493  | 18.81657601 | 6.798112004 |
| H26 | 1.990765915  | 18.53750908 | 8.515466363 |
| H27 | 0.704481547  | 18.69422523 | 7.320745334 |
| C28 | 1.235985844  | 16.54372828 | 5.772247963 |
| H29 | 1.943574558  | 17.01480185 | 5.081917336 |
| H30 | 0.251242677  | 16.9934486  | 5.611553131 |
| H31 | 1.173983918  | 15.48060339 | 5.540044312 |
| C32 | 5.057155276  | 11.21627955 | 6.969320093 |
| C33 | 5.781478605  | 12.63971471 | 5.416626108 |
| H34 | 6.160283096  | 13.56840387 | 5.0230829   |
| C35 | 5.482275245  | 11.48401468 | 4.784367012 |
| H36 | 5.558541253  | 11.23292952 | 3.742815861 |
| C37 | 4.610229626  | 9.169507741 | 5.442737963 |
| C38 | 5.533772681  | 8.190272166 | 6.191532602 |
| H39 | 6.576766287  | 8.34219344  | 5.894172677 |
| H40 | 5.251935109  | 7.164008856 | 5.936219604 |
| H41 | 5.454939361  | 8.311280018 | 7.271856071 |
| C42 | 3.130537641  | 8.976345071 | 5.822843839 |
| H43 | 2.497420128  | 9.688207732 | 5.284610268 |

|     |             |             |             |
|-----|-------------|-------------|-------------|
| H44 | 2.967751667 | 9.105208496 | 6.892031591 |
| H45 | 2.818617441 | 7.964603824 | 5.545535744 |
| C46 | 4.75883007  | 8.915713242 | 3.931859713 |
| H47 | 4.114244368 | 9.569866492 | 3.337171421 |
| H48 | 4.453739737 | 7.88559875  | 3.731894985 |
| H49 | 5.793493597 | 9.023393547 | 3.591504816 |
| C50 | 5.540201197 | 13.33451084 | 10.36640935 |
| C51 | 7.478757981 | 12.81965633 | 9.396739022 |
| H52 | 8.182001908 | 12.70048284 | 8.589429467 |
| C53 | 7.62650702  | 12.58920263 | 10.71931205 |
| H54 | 8.482037285 | 12.23202946 | 11.26157165 |
| C55 | 6.191838648 | 12.81491382 | 12.82453687 |
| C56 | 7.478837238 | 12.30917177 | 13.50060588 |
| H57 | 7.762064493 | 11.30953067 | 13.15761004 |
| H58 | 7.291777943 | 12.24575705 | 14.57551127 |
| H59 | 8.321555999 | 12.99191721 | 13.35429892 |
| C60 | 5.871267624 | 14.21343796 | 13.38521023 |
| H61 | 5.744798075 | 14.14604389 | 14.47026743 |
| H62 | 4.955313649 | 14.61802688 | 12.95509286 |
| H63 | 6.694135437 | 14.90617616 | 13.18001939 |
| C64 | 5.066649007 | 11.80297348 | 13.11023313 |
| H65 | 5.324302075 | 10.82013091 | 12.70323827 |
| H66 | 4.120183491 | 12.12399175 | 12.67673705 |

|     |              |             |             |
|-----|--------------|-------------|-------------|
| H67 | 4.938442044  | 11.70332143 | 14.19266006 |
| C68 | -0.408848898 | 10.34331708 | 8.400836312 |
| C69 | -0.85045448  | 11.15136848 | 7.342776311 |
| H70 | -0.796379448 | 12.23163594 | 7.435244987 |
| C71 | -1.358515071 | 10.57758326 | 6.175497756 |
| H72 | -1.691398324 | 11.22091208 | 5.364791517 |
| C73 | -1.448872438 | 9.189743198 | 6.050480583 |
| H74 | -1.849293083 | 8.74449415  | 5.144120185 |
| C75 | -1.022776658 | 8.38095313  | 7.105540795 |
| H76 | -1.090480969 | 7.298745823 | 7.024440244 |
| C77 | -0.50518901  | 8.951015034 | 8.270896324 |
| H78 | -0.172036699 | 8.315576803 | 9.085623839 |

$[\text{Tm}^{\text{Bu}^t}]\text{CdTePh}$ 

| atom | x            | y           | z           |
|------|--------------|-------------|-------------|
| Cd1  | -0.692373471 | 4.204439726 | 4.294931768 |
| Te2  | -3.167635663 | 5.265064563 | 5.158819623 |
| S3   | 0.664071167  | 2.425121202 | 5.803474463 |
| S4   | 1.401876999  | 5.783997268 | 3.703026099 |
| S5   | -0.768111097 | 2.777502166 | 2.004512772 |
| B6   | 2.599967838  | 2.612229954 | 2.898382099 |
| H7   | 3.612413001  | 2.123807161 | 2.457721136 |
| N8   | 2.961787571  | 2.996646064 | 4.368362641 |
| N9   | 3.17877642   | 3.348532979 | 6.535651301 |
| N10  | 2.317933338  | 3.833562868 | 1.970662648 |
| N11  | 1.868210634  | 5.745044311 | 0.965799451 |
| N12  | 1.538875507  | 1.473290226 | 2.794745369 |
| N13  | -0.17551594  | 0.113914582 | 2.519784794 |
| C14  | 2.298857926  | 2.94171304  | 5.558171684 |
| C15  | 4.247442185  | 3.451118956 | 4.604892201 |
| H16  | 4.955228817  | 3.574032264 | 3.801807103 |
| C17  | 4.387501789  | 3.670759324 | 5.929843502 |
| H18  | 5.241160546  | 4.019822393 | 6.480205138 |
| C19  | 2.939556247  | 3.431366152 | 8.022346974 |
| C20  | 4.226121902  | 3.921182288 | 8.711420814 |

|     |              |             |              |
|-----|--------------|-------------|--------------|
| H21 | 5.064737848  | 3.233654388 | 8.563407305  |
| H22 | 4.033453265  | 3.975759479 | 9.785823591  |
| H23 | 4.518690943  | 4.92187195  | 8.379650495  |
| C24 | 2.605079085  | 2.029048282 | 8.564553031  |
| H25 | 1.689986896  | 1.63544964  | 8.122151915  |
| H26 | 2.470854699  | 2.084719222 | 9.649377687  |
| H27 | 3.424779674  | 1.332996984 | 8.357552362  |
| C28 | 1.818592897  | 4.446866016 | 8.308878752  |
| H29 | 0.873561104  | 4.13445315  | 7.865849519  |
| H30 | 2.084439258  | 5.431602543 | 7.912168008  |
| H31 | 1.683572585  | 4.537429222 | 9.391245469  |
| C32 | 1.866124237  | 5.101843373 | 2.181379509  |
| C33 | 2.597033184  | 3.687657552 | 0.622855335  |
| H34 | 2.971071801  | 2.758956405 | 0.224472081  |
| C35 | 2.320681937  | 4.853656179 | 0.000234724  |
| H36 | 2.413868881  | 5.115819081 | -1.037114026 |
| C37 | 1.472803561  | 7.171514038 | 0.672385544  |
| C38 | -0.006509014 | 7.387325508 | 1.040003203  |
| H39 | -0.649960057 | 6.696729948 | 0.486997646  |
| H40 | -0.295955299 | 8.408593785 | 0.77367547   |
| H41 | -0.183172888 | 7.248034542 | 2.10554882   |
| C42 | 1.642019049  | 7.436142639 | -0.834330259 |
| H43 | 2.678279978  | 7.314107397 | -1.165108772 |

|     |              |              |              |
|-----|--------------|--------------|--------------|
| H44 | 1.356192357  | 8.473025024  | -1.028038468 |
| H45 | 0.99263402   | 6.798431189  | -1.441500187 |
| C46 | 2.406740223  | 8.125115574  | 1.440594327  |
| H47 | 3.449405387  | 7.958280754  | 1.150020009  |
| H48 | 2.316541633  | 7.99211097   | 2.51874291   |
| H49 | 2.145508158  | 9.159347272  | 1.195685448  |
| C50 | 0.218309357  | 1.431022348  | 2.460800207  |
| C51 | 1.963929341  | 0.184021133  | 3.065376337  |
| H52 | 2.982283229  | -0.023025373 | 3.35053573   |
| C53 | 0.918354787  | -0.654292523 | 2.90145921   |
| H54 | 0.869956203  | -1.72065661  | 3.019236987  |
| C55 | -1.543744826 | -0.454054593 | 2.240488038  |
| C56 | -2.55567857  | 0.127941689  | 3.244393087  |
| H57 | -2.251664573 | -0.102934862 | 4.270130378  |
| H58 | -3.537362312 | -0.322645019 | 3.067886488  |
| H59 | -2.647146815 | 1.20876634   | 3.142870461  |
| C60 | -1.501829747 | -1.982163447 | 2.423887751  |
| H61 | -1.245090777 | -2.269464236 | 3.44791587   |
| H62 | -0.807438439 | -2.465644332 | 1.729627723  |
| H63 | -2.500153935 | -2.374407173 | 2.214470529  |
| C64 | -1.93363702  | -0.150858817 | 0.782077624  |
| H65 | -1.204351135 | -0.587387329 | 0.091540963  |
| H66 | -1.992677274 | 0.921852     | 0.59817197   |



|     |              |              |              |
|-----|--------------|--------------|--------------|
| H67 | -2.911588784 | -0.594775515 | 0.57132471   |
| C68 | -3.693754123 | 5.985415337  | 3.191471674  |
| C69 | -3.993137351 | 5.096926638  | 2.148008073  |
| H70 | -3.941984246 | 4.026505301  | 2.320621735  |
| C71 | -4.35605451  | 5.575169851  | 0.886254375  |
| H72 | -4.579109937 | 4.869010806  | 0.09032876   |
| C73 | -4.438534805 | 6.948223897  | 0.647796193  |
| H74 | -4.726994636 | 7.31931621   | -0.331839414 |
| C75 | -4.152514861 | 7.839326461  | 1.683805578  |
| H76 | -4.217103205 | 8.911488667  | 1.514211521  |
| C77 | -3.780491911 | 7.363206171  | 2.944010487  |
| H78 | -3.555333824 | 8.067392443  | 3.739560912  |

$\text{Cp}^*_2\text{Zr}(\text{OPh})_2$ 

| atom | x            | y           | z           |
|------|--------------|-------------|-------------|
| Zr1  | -3.16074032  | 9.397090034 | 12.46335915 |
| C2   | -5.184942014 | 9.589927563 | 10.80356229 |
| C3   | -5.759868855 | 9.251624801 | 12.05784903 |
| C4   | -5.32721924  | 7.938526206 | 12.41167081 |
| C5   | -4.523945108 | 7.438658436 | 11.33105186 |
| C6   | -4.41070358  | 8.471266709 | 10.35720884 |
| C7   | -5.456058132 | 10.85131986 | 10.0307541  |
| C8   | -6.729445868 | 10.08575148 | 12.84410435 |
| C9   | -5.832427543 | 7.165837923 | 13.60223333 |
| C10  | -4.153191253 | 6.002725501 | 11.0792586  |
| C11  | -3.747498517 | 8.327628621 | 9.013814807 |
| O12  | -3.941691403 | 10.68511247 | 13.80061715 |
| C13  | -4.223847527 | 11.62158222 | 14.71068565 |
| C14  | -4.897823875 | 11.2882911  | 15.90085145 |
| C15  | -5.19650096  | 12.27359532 | 16.84031832 |
| C16  | -4.838647439 | 13.60416378 | 16.6174719  |
| C17  | -4.174894275 | 13.93929733 | 15.43505872 |
| C18  | -3.867374042 | 12.96497683 | 14.48790573 |
| H19  | -4.661357614 | 11.07499228 | 9.31751977  |
| H20  | -5.556288812 | 11.71934864 | 10.68793511 |

|     |              |             |             |
|-----|--------------|-------------|-------------|
| H21 | -6.392776187 | 10.76135568 | 9.465590165 |
| H22 | -6.631138459 | 11.14898161 | 12.61452961 |
| H23 | -6.587231532 | 9.972279369 | 13.92022755 |
| H24 | -7.761468971 | 9.791560903 | 12.61200622 |
| H25 | -5.258691797 | 6.251900003 | 13.77028363 |
| H26 | -6.879810067 | 6.868729435 | 13.46293979 |
| H27 | -5.791422887 | 7.756882433 | 14.52324592 |
| H28 | -4.165042446 | 5.404676577 | 11.99017478 |
| H29 | -3.170587347 | 5.89486688  | 10.61239763 |
| H30 | -4.88058231  | 5.553524412 | 10.38989273 |
| H31 | -2.83475773  | 7.725958526 | 9.068152899 |
| H32 | -3.478645611 | 9.297181703 | 8.590544786 |
| H33 | -4.416959116 | 7.830224229 | 8.299372527 |
| H34 | -5.174776363 | 10.25285976 | 16.07338315 |
| H35 | -5.715125697 | 11.99656465 | 17.75474589 |
| H36 | -5.071270166 | 14.36771586 | 17.3532128  |
| H37 | -3.890192911 | 14.96948542 | 15.24704836 |
| H38 | -3.341719579 | 13.22144416 | 13.57450196 |
| C39 | -1.140984978 | 9.575478362 | 14.12794942 |
| C40 | -0.564289116 | 9.247345372 | 12.87201932 |
| C41 | -0.993328974 | 7.935395472 | 12.50885019 |
| C42 | 0.402889906  | 10.09257565 | 12.09496736 |
| H43 | 0.244756376  | 11.15913889 | 12.2692159  |

|     |              |             |             |
|-----|--------------|-------------|-------------|
| H44 | 0.31756496   | 9.92488365  | 11.01996957 |
| H45 | 1.435024879  | 9.858948233 | 12.38733002 |
| C46 | -1.798167326 | 7.427185824 | 13.58451147 |
| C47 | -1.914776903 | 8.453266722 | 14.56492718 |
| C48 | -0.869801799 | 10.8285217  | 14.91332527 |
| H49 | -1.694441944 | 11.08309238 | 15.58082522 |
| H50 | -0.701390312 | 11.68873623 | 14.26011422 |
| H51 | 0.030184066  | 10.70766729 | 15.53020768 |
| C52 | -2.167189866 | 5.988980717 | 13.82695271 |
| H53 | -2.165593374 | 5.396663153 | 12.91200259 |
| H54 | -3.145139565 | 5.878741979 | 14.30300142 |
| H55 | -1.433395509 | 5.534130384 | 14.50586391 |
| C56 | -2.578849415 | 8.303703989 | 15.90707117 |
| H57 | -3.494623408 | 7.707091121 | 15.84952108 |
| H58 | -2.841851804 | 9.27269654  | 16.33560723 |
| H59 | -1.911722394 | 7.798877921 | 16.61854852 |
| O60 | -2.376704885 | 10.68551027 | 11.12841805 |
| C61 | -2.099859661 | 11.61548896 | 10.21009097 |
| C62 | -1.418099425 | 11.27631651 | 9.026069112 |
| C63 | -1.125679377 | 12.25444257 | 8.077063314 |
| C64 | -1.496797934 | 13.58392372 | 8.284806049 |
| C65 | -2.167446475 | 13.9250522  | 9.461693787 |
| C66 | -2.469367967 | 12.95766227 | 10.41780406 |

|     |              |             |             |
|-----|--------------|-------------|-------------|
| H67 | -2.999833393 | 13.21892055 | 11.32706156 |
| H68 | -2.462223313 | 14.95444287 | 9.638128157 |
| H69 | -1.268953817 | 14.34187384 | 7.541776425 |
| H70 | -0.601269002 | 11.97289128 | 7.167284825 |
| H71 | -1.130418909 | 10.24193671 | 8.865803512 |
| C72 | -0.486730229 | 7.169699221 | 11.3142348  |
| H73 | -1.057414198 | 6.254276595 | 11.14396673 |
| H74 | 0.561836724  | 6.875666959 | 11.45065438 |
| H75 | -0.531586411 | 7.763429221 | 10.39517146 |

$\text{Cp}^*_2\text{Zr}(\text{SPh})_2$ 

| atom | x           | y            | z           |
|------|-------------|--------------|-------------|
| Zr1  | 6.165036357 | 1.065937447  | 4.442951231 |
| S2   | 7.87140301  | 2.683032404  | 5.458239671 |
| C3   | 7.321538188 | 3.996474778  | 6.537886544 |
| C4   | 6.146467355 | 4.730591093  | 6.312400358 |
| C5   | 5.825548092 | 5.816081775  | 7.130155911 |
| C6   | 6.666332267 | 6.188964384  | 8.17972226  |
| C7   | 7.840069205 | 5.46644127   | 8.40467475  |
| C8   | 8.167136261 | 4.381605975  | 7.592519989 |
| C9   | 3.855493119 | 0.219707931  | 5.379913238 |
| C10  | 4.264390722 | 1.251127767  | 6.291979003 |
| C11  | 5.443819285 | 0.810658075  | 6.950410431 |
| C12  | 5.775857407 | -0.489678333 | 6.448996564 |
| C13  | 4.760737167 | -0.87177153  | 5.512828252 |
| C14  | 2.547470938 | 0.18113252   | 4.63721235  |
| C15  | 3.43316819  | 2.446944819  | 6.665004029 |
| C16  | 6.090331249 | 1.428685076  | 8.156436297 |
| C17  | 6.81966614  | -1.37370628  | 7.079256154 |
| C18  | 4.467495979 | -2.268050874 | 5.035329081 |
| H19  | 5.488589885 | 4.453220493  | 5.495390545 |
| H20  | 4.912769757 | 6.374798253  | 6.938044894 |

|     |             |              |             |
|-----|-------------|--------------|-------------|
| H21 | 6.413228171 | 7.035567114  | 8.812105939 |
| H22 | 8.506638244 | 5.747584518  | 9.21630948  |
| H23 | 9.08470207  | 3.82700939   | 7.766719761 |
| H24 | 1.747389148 | -0.186836136 | 5.2946587   |
| H25 | 2.255286703 | 1.170391243  | 4.278255112 |
| H26 | 2.58933941  | -0.486097173 | 3.77119788  |
| H27 | 2.638793998 | 2.139735974  | 7.359021226 |
| H28 | 4.026802758 | 3.217068504  | 7.1612698   |
| H29 | 2.9596316   | 2.901565441  | 5.791922782 |
| H30 | 5.749994962 | 0.906135433  | 9.061229673 |
| H31 | 7.180229753 | 1.355065889  | 8.120168211 |
| H32 | 5.836808064 | 2.482986178  | 8.267115346 |
| H33 | 6.552036073 | -1.586568641 | 8.122583444 |
| H34 | 6.908990792 | -2.333367739 | 6.568083292 |
| H35 | 7.809559931 | -0.904697199 | 7.096550831 |
| H36 | 3.713520143 | -2.721635205 | 5.693794073 |
| H37 | 4.058465974 | -2.294675456 | 4.023060414 |
| H38 | 5.345714619 | -2.91376972  | 5.067074927 |
| S39 | 4.459504641 | 2.688194533  | 3.434487946 |
| C40 | 5.010062017 | 3.997389694  | 2.35052823  |
| C41 | 6.183350716 | 4.734702415  | 2.573504457 |
| C42 | 6.504957772 | 5.814151359  | 1.748092012 |
| C43 | 5.665929683 | 6.178396743  | 0.69402055  |

|     |             |              |              |
|-----|-------------|--------------|--------------|
| C44 | 4.493041269 | 5.453346483  | 0.472380927  |
| C45 | 4.165622188 | 4.374284616  | 1.292037314  |
| H46 | 3.248882736 | 3.817446247  | 1.120266784  |
| H47 | 3.827772208 | 5.727479618  | -0.342714327 |
| H48 | 5.919693163 | 7.020254686  | 0.055573542  |
| H49 | 7.417588876 | 6.374243533  | 1.937105541  |
| H50 | 6.841281933 | 4.46257743   | 3.392215618  |
| C51 | 8.473499875 | 0.223136883  | 3.506502047  |
| C52 | 8.066074615 | 1.256967378  | 2.596410845  |
| C53 | 6.887104256 | 0.818881716  | 1.935602501  |
| C54 | 8.900713718 | 2.452006543  | 2.227653704  |
| H55 | 9.703029358 | 2.142017196  | 1.544128292  |
| H56 | 8.312452801 | 3.219510692  | 1.721574102  |
| H57 | 9.365028055 | 2.910291809  | 3.103926573  |
| C58 | 6.553711298 | -0.482677962 | 2.433521992  |
| C59 | 7.56816687  | -0.867492264 | 3.369667276  |
| C60 | 9.781587381 | 0.181234176  | 4.249361728  |
| H61 | 10.58106517 | -0.188064568 | 3.591930762  |
| H62 | 10.07581026 | 1.16945421   | 4.609439882  |
| H63 | 9.738016517 | -0.48669644  | 5.114755715  |
| C64 | 5.509728672 | -1.365020981 | 1.800583597  |
| H65 | 5.774010824 | -1.572294503 | 0.754925911  |
| H66 | 5.423523172 | -2.327405559 | 2.307287395  |



|     |             |              |              |
|-----|-------------|--------------|--------------|
| H67 | 4.518907812 | -0.897733387 | 1.788850131  |
| C68 | 7.860224314 | -2.26470083  | 3.844921035  |
| H69 | 8.612964889 | -2.71848469  | 3.185218357  |
| H70 | 8.270459651 | -2.292827499 | 4.856606333  |
| H71 | 6.981023499 | -2.908973333 | 3.81378733   |
| C72 | 6.240731891 | 1.439910823  | 0.731356234  |
| H73 | 6.574867557 | 0.914632858  | -0.174113187 |
| H74 | 5.150493298 | 1.373362084  | 0.771366702  |
| H75 | 6.500763605 | 2.49245616   | 0.619097897  |

$\text{Cp}^*_2\text{Zr}(\text{SePh})_2$ 

| atom | x            | y           | z           |
|------|--------------|-------------|-------------|
| Zr1  | 0.097078462  | 7.821968778 | 7.984375077 |
| Se2  | 1.013177883  | 5.687298691 | 9.403229714 |
| Se3  | 2.208495779  | 8.154161286 | 6.290712468 |
| C4   | -1.049923712 | 9.387358879 | 9.746413862 |
| C5   | -0.282530179 | 10.21045717 | 8.859528793 |
| C6   | 1.103955246  | 9.95907531  | 9.11567292  |
| C7   | 1.194684957  | 8.956248951 | 10.11924895 |
| C8   | -0.140997655 | 8.587641691 | 10.49687691 |
| C9   | -2.257198404 | 7.016059774 | 7.358215991 |
| C10  | -2.068026851 | 8.18973863  | 6.559751588 |
| C11  | -1.040863538 | 7.913686608 | 5.611970275 |
| C12  | -0.642696735 | 6.542946143 | 5.773948172 |
| C13  | -1.396148735 | 5.992211259 | 6.846439202 |
| C14  | -2.498291178 | 9.570764693 | 10.11308044 |
| C15  | -0.773121904 | 11.3877457  | 8.057436989 |
| C16  | 2.22188035   | 10.82044045 | 8.603051704 |
| C17  | 2.44658391   | 8.559327618 | 10.85305836 |
| C18  | -0.515509047 | 7.733195554 | 11.6782489  |
| C19  | -3.378593916 | 6.748092726 | 8.326304836 |
| C20  | -3.007455579 | 9.36100783  | 6.461350678 |

|     |              |             |             |
|-----|--------------|-------------|-------------|
| C21 | -0.655281178 | 8.81004765  | 4.465092068 |
| C22 | 0.19747112   | 5.759534385 | 4.802631258 |
| C23 | -1.513426927 | 4.539345517 | 7.208447956 |
| C24 | 1.629145085  | 4.139024286 | 8.371424625 |
| C25 | 2.399907813  | 4.267141143 | 7.209278558 |
| C26 | 2.910719574  | 3.129771836 | 6.578222457 |
| C27 | 2.660496495  | 1.858432394 | 7.09628876  |
| C28 | 1.89694727   | 1.729990251 | 8.257937419 |
| C29 | 1.383335198  | 2.861516493 | 8.893101425 |
| C30 | 3.986939497  | 8.32787378  | 7.098861651 |
| C31 | 4.451752521  | 7.445221002 | 8.081262877 |
| C32 | 5.769961785  | 7.533863384 | 8.535932199 |
| C33 | 6.636499119  | 8.496357099 | 8.01613115  |
| C34 | 6.176237318  | 9.374115438 | 7.03316     |
| C35 | 4.860540546  | 9.291261196 | 6.574649513 |
| H36 | -2.569419167 | 10.25226196 | 10.9721559  |
| H37 | -3.087131797 | 10.01455857 | 9.309131721 |
| H38 | -2.977541649 | 8.635886101 | 10.41046315 |
| H39 | -0.456924887 | 12.32429637 | 8.535060276 |
| H40 | -0.369973716 | 11.40000646 | 7.039472321 |
| H41 | -1.861154777 | 11.41119249 | 7.990714936 |
| H42 | 2.275274593  | 11.74601258 | 9.193245837 |
| H43 | 3.188831088  | 10.32355286 | 8.674076437 |

|     |              |             |             |
|-----|--------------|-------------|-------------|
| H44 | 2.074165604  | 11.09898312 | 7.556763869 |
| H45 | 2.576879276  | 9.203235796 | 11.73375128 |
| H46 | 2.409267355  | 7.523707003 | 11.19645673 |
| H47 | 3.335023839  | 8.667793799 | 10.22885837 |
| H48 | -0.574008027 | 8.349781276 | 12.58571456 |
| H49 | -1.489626369 | 7.254390118 | 11.54553054 |
| H50 | 0.215684461  | 6.943650993 | 11.86046402 |
| H51 | -4.116202526 | 6.074840847 | 7.870751708 |
| H52 | -3.030053856 | 6.263466952 | 9.244197292 |
| H53 | -3.904230273 | 7.662198989 | 8.603690436 |
| H54 | -3.776598165 | 9.141331368 | 5.707944145 |
| H55 | -3.530848881 | 9.567119137 | 7.395862887 |
| H56 | -2.504555715 | 10.27583083 | 6.142709682 |
| H57 | -1.328839942 | 8.64685877  | 3.612768447 |
| H58 | -0.719742531 | 9.86831491  | 4.733291686 |
| H59 | 0.364005512  | 8.620824551 | 4.123323757 |
| H60 | -0.434257316 | 5.401800842 | 3.977840356 |
| H61 | 0.999104742  | 6.362982564 | 4.373265069 |
| H62 | 0.656054864  | 4.887426072 | 5.272073261 |
| H63 | -2.402893517 | 4.111189187 | 6.725394703 |
| H64 | -0.647935927 | 3.962957197 | 6.882005657 |
| H65 | -1.615921597 | 4.394095162 | 8.286783499 |
| H66 | 2.601224378  | 5.251210273 | 6.797675826 |

|     |             |             |             |
|-----|-------------|-------------|-------------|
| H67 | 3.508471129 | 3.24412011  | 5.677518924 |
| H68 | 3.061931926 | 0.977059199 | 6.604188532 |
| H69 | 1.696606085 | 0.745648048 | 8.673357226 |
| H70 | 0.794621377 | 2.755966379 | 9.799505348 |
| H71 | 3.786746607 | 6.692980999 | 8.493107588 |
| H72 | 6.117566503 | 6.841889592 | 9.298829352 |
| H73 | 7.661173319 | 8.560661612 | 8.371493523 |
| H74 | 6.842485804 | 10.12583705 | 6.617566498 |
| H75 | 4.509765626 | 9.971569494 | 5.80439543  |

$\text{Cp}^*_2\text{Zr}(\text{TePh})_2$ 

| atom | x            | y            | z            |
|------|--------------|--------------|--------------|
| Zr1  | -0.738574375 | -1.218091639 | 0.808227398  |
| Te2  | 0.219136686  | -2.714987146 | -1.526375437 |
| Te3  | -0.318718267 | 1.485952331  | -0.265213901 |
| C4   | 1.036744578  | -2.863525012 | 1.851558163  |
| C5   | 1.797586696  | -1.718461835 | 1.436316841  |
| C6   | 1.381922404  | -0.608398304 | 2.223182278  |
| C7   | 0.361511763  | -1.055151332 | 3.123054025  |
| C8   | 0.176939118  | -2.45990872  | 2.915344172  |
| C9   | -3.080413302 | -0.083569386 | 1.214591238  |
| C10  | -3.136003534 | -0.573901387 | -0.134412201 |
| C11  | -3.075310997 | -1.994602377 | -0.085908208 |
| C12  | -2.979407573 | -2.390952948 | 1.286600945  |
| C13  | -3.022433513 | -1.207428797 | 2.090172835  |
| C14  | 1.310197896  | -4.296670818 | 1.47725918   |
| C15  | 3.016912458  | -1.733239028 | 0.553644332  |
| C16  | 2.098413104  | 0.705685131  | 2.349274807  |
| C17  | -0.133669831 | -0.229652149 | 4.281662272  |
| C18  | -0.487194238 | -3.427555689 | 3.857512083  |
| C19  | -3.360651208 | 1.328031145  | 1.65829467   |
| C20  | -3.507359766 | 0.225932452  | -1.354530186 |

|     |              |              |              |
|-----|--------------|--------------|--------------|
| C21 | -3.404845399 | -2.934170533 | -1.210536745 |
| C22 | -3.157096608 | -3.814154998 | 1.746493336  |
| C23 | -3.343118825 | -1.13475552  | 3.558689356  |
| C24 | -0.775374379 | -2.179623619 | -3.353963529 |
| C25 | -1.219605108 | -3.200238073 | -4.207862301 |
| C26 | -1.750020227 | -2.895315356 | -5.463550039 |
| C27 | -1.845326518 | -1.568119765 | -5.883820223 |
| C28 | -1.40393022  | -0.547774439 | -5.039949544 |
| C29 | -0.869695074 | -0.848778893 | -3.78421996  |
| C30 | 1.689715801  | 1.85783079   | -0.938928139 |
| C31 | 2.324513294  | 1.02595608   | -1.872029915 |
| C32 | 3.573197086  | 1.372909168  | -2.395686663 |
| C33 | 4.203946633  | 2.554539482  | -2.001558047 |
| C34 | 3.575037315  | 3.38887576   | -1.07611892  |
| C35 | 2.328127193  | 3.044501711  | -0.548157924 |
| H36 | 1.992563219  | -4.752070216 | 2.208368132  |
| H37 | 0.398438834  | -4.900596319 | 1.461959999  |
| H38 | 1.776671923  | -4.386468794 | 0.494371201  |
| H39 | 3.916343724  | -1.846606143 | 1.174932507  |
| H40 | 3.001477104  | -2.556946994 | -0.161955528 |
| H41 | 3.122173423  | -0.807069459 | -0.014846609 |
| H42 | 2.836024141  | 0.642390486  | 3.162652067  |
| H43 | 2.631620566  | 0.975964529  | 1.437518566  |

|     |              |              |              |
|-----|--------------|--------------|--------------|
| H44 | 1.412330379  | 1.52293558   | 2.584203489  |
| H45 | 0.703764859  | 0.027493493  | 4.943295944  |
| H46 | -0.584257162 | 0.71591126   | 3.961555616  |
| H47 | -0.867195256 | -0.768086815 | 4.882948996  |
| H48 | 0.266756353  | -3.83220135  | 4.547235064  |
| H49 | -1.259163579 | -2.960055657 | 4.470322757  |
| H50 | -0.931758847 | -4.280231531 | 3.340488404  |
| H51 | -4.430546526 | 1.448553846  | 1.878295287  |
| H52 | -2.809458962 | 1.593473316  | 2.56492105   |
| H53 | -3.09944953  | 2.060056254  | 0.89213331   |
| H54 | -4.59466195  | 0.174496354  | -1.504248086 |
| H55 | -3.235615282 | 1.278658606  | -1.260808046 |
| H56 | -3.030047689 | -0.157918039 | -2.258344669 |
| H57 | -4.480473057 | -3.161013494 | -1.190044598 |
| H58 | -3.172767109 | -2.508440648 | -2.186554754 |
| H59 | -2.863473519 | -3.879768552 | -1.127095531 |
| H60 | -4.141167493 | -4.18843112  | 1.435305781  |
| H61 | -2.41169827  | -4.48879044  | 1.313018473  |
| H62 | -3.105478898 | -3.904184516 | 2.83241958   |
| H63 | -4.431848164 | -1.049041906 | 3.682697467  |
| H64 | -3.031128558 | -2.025141036 | 4.106398625  |
| H65 | -2.900765549 | -0.262567955 | 4.043562482  |
| H66 | -1.147604242 | -4.2380839   | -3.894392073 |



|     |              |              |              |
|-----|--------------|--------------|--------------|
| H67 | -2.089296171 | -3.69907094  | -6.112433322 |
| H68 | -2.257098987 | -1.33133793  | -6.861218718 |
| H69 | -1.469061308 | 0.489961272  | -5.357750796 |
| H70 | -0.530904135 | -0.042616577 | -3.139788967 |
| H71 | 1.848965529  | 0.10286418   | -2.190977846 |
| H72 | 4.048886944  | 0.715401007  | -3.119204061 |
| H73 | 5.172511133  | 2.823863566  | -2.4136454   |
| H74 | 4.052493104  | 4.313901655  | -0.762048026 |
| H75 | 1.847875788  | 3.707585326  | 0.166239793  |

**TP<sub>2</sub>LaOPh**

| <b>atom</b> | <b>x</b>     | <b>y</b>     | <b>z</b>     |
|-------------|--------------|--------------|--------------|
| La1         | 0.206304027  | -0.432911772 | 0.022517322  |
| N2          | 0.265800872  | 0.44978062   | -2.492618447 |
| N3          | 1.367671225  | 1.050009638  | -3.02703176  |
| C4          | -0.633899828 | 0.34736107   | -3.48173501  |
| C5          | -0.128974202 | 0.888398951  | -4.671129463 |
| C6          | 1.145692467  | 1.320313766  | -4.333139655 |
| N7          | 2.770637704  | -0.719088054 | -0.755763141 |
| N8          | 3.342078568  | 0.123375686  | -1.662675726 |
| C9          | 3.67173779   | -1.680262351 | -0.507662664 |
| C10         | 4.843134385  | -1.468573929 | -1.246333126 |
| C11         | 4.585978518  | -0.310893984 | -1.965732875 |
| N12         | 1.424989174  | 1.945606888  | -0.0650109   |
| N13         | 2.283733003  | 2.338622511  | -1.043163063 |
| C14         | 1.312083937  | 2.976349697  | 0.784980311  |
| C15         | 2.106370292  | 4.051664989  | 0.361121744  |
| C16         | 2.704219618  | 3.601380495  | -0.806693471 |
| B17         | 2.646823837  | 1.402429399  | -2.20998208  |
| N18         | 0.234785906  | -2.740405729 | -1.448980552 |
| N19         | -0.509195659 | -3.825774424 | -1.102760236 |
| C20         | 0.882976682  | -3.070377943 | -2.574799996 |

|     |              |              |              |
|-----|--------------|--------------|--------------|
| C21 | 0.563824815  | -4.378063989 | -2.968786178 |
| C22 | -0.32599027  | -4.819239241 | -2.001495726 |
| N23 | -2.265907949 | -1.426624515 | -0.179845489 |
| N24 | -2.531971472 | -2.7527211   | -0.0102079   |
| C25 | -3.451836182 | -0.801660118 | -0.217138293 |
| C26 | -4.502367782 | -1.718744121 | -0.084989492 |
| C27 | -3.868869802 | -2.944555172 | 0.049267967  |
| N28 | 0.192771287  | -2.540532767 | 1.66032696   |
| N29 | -0.600736574 | -3.624131422 | 1.432549863  |
| C30 | 0.720018014  | -2.70368674  | 2.883359451  |
| C31 | 0.276568376  | -3.899449859 | 3.461747916  |
| C32 | -0.562904094 | -4.447880459 | 2.502961276  |
| B33 | -1.43087235  | -3.835661908 | 0.132607218  |
| O34 | -0.795252869 | 0.798252304  | 1.659836054  |
| C35 | -1.757861757 | 1.182618656  | 2.501456716  |
| C36 | -2.152836336 | 0.369392924  | 3.582627542  |
| C37 | -3.170707749 | 0.777046249  | 4.441294963  |
| C38 | -3.817417311 | 2.00139888   | 4.25709743   |
| C39 | -3.426213994 | 2.818060017  | 3.195073381  |
| C40 | -2.411089653 | 2.420107249  | 2.326960721  |
| H41 | -1.594729108 | -0.112573745 | -3.290049778 |
| H42 | -0.615219453 | 0.95588033   | -5.632999264 |
| H43 | 1.907442585  | 1.802713064  | -4.928057433 |

|     |              |              |              |
|-----|--------------|--------------|--------------|
| H44 | 3.430687533  | -2.481705362 | 0.178778655  |
| H45 | 5.741873313  | -2.066224111 | -1.256616103 |
| H46 | 5.198590577  | 0.235151051  | -2.668031257 |
| H47 | 0.656704579  | 2.885756697  | 1.639538615  |
| H48 | 2.224761378  | 5.01606075   | 0.83150092   |
| H49 | 3.392282247  | 4.086282708  | -1.484002668 |
| H50 | 3.41456473   | 1.958901675  | -2.947443993 |
| H51 | 1.544938746  | -2.355393748 | -3.042816553 |
| H52 | 0.925533642  | -4.922621675 | -3.82785703  |
| H53 | -0.840027273 | -5.762727001 | -1.888247151 |
| H54 | -3.49572279  | 0.275265988  | -0.313744271 |
| H55 | -5.563050265 | -1.519370332 | -0.075807396 |
| H56 | -4.272874582 | -3.937076662 | 0.18532406   |
| H57 | 1.382636401  | -1.952243528 | 3.293998961  |
| H58 | 0.523069568  | -4.302847238 | 4.432160204  |
| H59 | -1.136023038 | -5.363446175 | 2.508208956  |
| H60 | -1.96802492  | -4.907515727 | 0.211713407  |
| H61 | -1.654459112 | -0.585561625 | 3.722874251  |
| H62 | -3.464790275 | 0.128957601  | 5.263451675  |
| H63 | -4.612700869 | 2.311817141  | 4.928664157  |
| H64 | -3.917865378 | 3.775186925  | 3.037927998  |
| H65 | -2.106109095 | 3.053705437  | 1.498303842  |

**TP<sub>2</sub>LaSPh**

| <b>atom</b> | <b>x</b>     | <b>y</b>     | <b>z</b>     |
|-------------|--------------|--------------|--------------|
| La1         | -0.244925671 | -0.159530159 | -0.262819406 |
| N2          | -2.51457772  | 1.190125572  | -0.045446139 |
| N3          | -3.36952027  | 1.346189941  | -1.095223988 |
| C4          | -3.077699026 | 1.810424263  | 1.003705098  |
| C5          | -4.304643077 | 2.378819113  | 0.64360023   |
| C6          | -4.447027181 | 2.057606128  | -0.699033405 |
| N7          | -1.925812808 | -1.39504414  | -1.951256538 |
| N8          | -2.948007529 | -0.726187134 | -2.554643766 |
| C9          | -2.112273719 | -2.695867376 | -2.217103754 |
| C10         | -3.256374107 | -2.883964734 | -3.003336464 |
| C11         | -3.755068477 | -1.603792502 | -3.191924427 |
| N12         | -0.579683165 | 1.285299041  | -2.526103063 |
| N13         | -1.80696894  | 1.460907696  | -3.096407133 |
| C14         | 0.295313572  | 1.944169691  | -3.302174396 |
| C15         | -0.358177161 | 2.549874637  | -4.38364885  |
| C16         | -1.691776807 | 2.215894644  | -4.21163811  |
| B17         | -3.085724043 | 0.817163035  | -2.532812221 |
| N18         | -1.779011482 | -1.829009956 | 1.225917926  |
| N19         | -1.250096605 | -2.831518712 | 1.978368257  |
| C20         | -3.11052155  | -1.968065504 | 1.292660378  |

|     |              |              |              |
|-----|--------------|--------------|--------------|
| C21 | -3.457209569 | -3.063561975 | 2.095742727  |
| C22 | -2.240092066 | -3.582086131 | 2.51075031   |
| N23 | 0.752370444  | -0.464646774 | 2.18726214   |
| N24 | 0.828505028  | -1.674832114 | 2.811303403  |
| C25 | 1.281260746  | 0.432967947  | 3.032242252  |
| C26 | 1.695007266  | -0.184751817 | 4.218756985  |
| C27 | 1.391595738  | -1.524045808 | 4.030645717  |
| N28 | 0.929386738  | -2.530621931 | -0.262111903 |
| N29 | 0.983739936  | -3.315541651 | 0.850529076  |
| C30 | 1.668240326  | -3.144405747 | -1.201306546 |
| C31 | 2.207312452  | -4.337034719 | -0.706411812 |
| C32 | 1.745742839  | -4.401701979 | 0.600987809  |
| B33 | 0.271487056  | -2.976790183 | 2.195100317  |
| S34 | 2.098281116  | 1.521263619  | -0.506130571 |
| C35 | 3.467170779  | 1.141504668  | 0.570313628  |
| C36 | 4.03494883   | -0.142247486 | 0.64002242   |
| C37 | 5.120992728  | -0.39708655  | 1.477261743  |
| C38 | 5.670484916  | 0.621404119  | 2.258330898  |
| C39 | 5.121231924  | 1.902930462  | 2.188376896  |
| C40 | 4.033854447  | 2.161998523  | 1.354420242  |
| H41 | -2.578527866 | 1.815602651  | 1.964267334  |
| H42 | -4.986378872 | 2.940576466  | 1.263692279  |
| H43 | -5.236615292 | 2.287227371  | -1.399382777 |

|     |              |              |              |
|-----|--------------|--------------|--------------|
| H44 | -1.421895127 | -3.428968935 | -1.823118311 |
| H45 | -3.66048769  | -3.811441238 | -3.379639589 |
| H46 | -4.621159783 | -1.255085138 | -3.735154366 |
| H47 | 1.34153291   | 1.962368136  | -3.02795812  |
| H48 | 0.075891377  | 3.147496342  | -5.170677108 |
| H49 | -2.565399944 | 2.458322138  | -4.799290486 |
| H50 | -4.020368859 | 1.123175984  | -3.222464859 |
| H51 | -3.751546204 | -1.281955318 | 0.757460767  |
| H52 | -4.444955046 | -3.423802936 | 2.340428433  |
| H53 | -2.00777661  | -4.424715844 | 3.145725388  |
| H54 | 1.37203812   | 1.467595991  | 2.732083054  |
| H55 | 2.162941473  | 0.271429831  | 5.077503593  |
| H56 | 1.53926692   | -2.379567454 | 4.673548122  |
| H57 | 1.779821776  | -2.698969422 | -2.181729753 |
| H58 | 2.840403356  | -5.045256316 | -1.218606026 |
| H59 | 1.906978959  | -5.143135762 | 1.369664741  |
| H60 | 0.474237752  | -3.884747531 | 2.954561533  |
| H61 | 3.620752848  | -0.941551011 | 0.032954067  |
| H62 | 5.540872391  | -1.399558164 | 1.516187774  |
| H63 | 6.517333393  | 0.420339804  | 2.908820463  |
| H64 | 5.541184665  | 2.709217871  | 2.785407842  |
| H65 | 3.614411026  | 3.162544506  | 1.299114554  |

**TP<sub>2</sub>LaSePh**

| <b>atom</b> | <b>x</b>     | <b>y</b>     | <b>z</b>     |
|-------------|--------------|--------------|--------------|
| La1         | 0.023747784  | 0.16188443   | -0.098185778 |
| N2          | -1.364905941 | -1.975054946 | 0.594004952  |
| N3          | -2.570371276 | -2.270480765 | 0.030792815  |
| C4          | -1.109253    | -2.945673533 | 1.486161332  |
| C5          | -2.153007451 | -3.877092942 | 1.518176415  |
| C6          | -3.057804428 | -3.405742011 | 0.576784636  |
| N7          | -1.173694258 | -0.662279157 | -2.354936445 |
| N8          | -2.38289157  | -1.290184587 | -2.333394835 |
| C9          | -0.735680831 | -0.721141241 | -3.620932743 |
| C10         | -1.660354449 | -1.387057236 | -4.436551528 |
| C11         | -2.691080893 | -1.730095775 | -3.573909556 |
| N12         | -2.578476569 | 0.889077691  | -0.141357562 |
| N13         | -3.556127245 | 0.013716752  | -0.516286187 |
| C14         | -3.20233717  | 2.030620635  | 0.191358984  |
| C15         | -4.588897413 | 1.90205529   | 0.039279053  |
| C16         | -4.767399015 | 0.604599028  | -0.41108774  |
| B17         | -3.259257451 | -1.39609447  | -1.057015521 |
| N18         | 1.549161234  | -1.829847668 | -1.131169018 |
| N19         | 2.906762406  | -1.761427908 | -1.178754006 |
| C20         | 1.208373523  | -2.995020827 | -1.699752999 |



|      |              |              |              |
|------|--------------|--------------|--------------|
| C21  | 2.347783579  | -3.694745024 | -2.121579206 |
| C22  | 3.405926863  | -2.870876275 | -1.766988727 |
| N23  | 2.123742453  | -0.309622885 | 1.450507446  |
| N24  | 3.377819508  | -0.481909217 | 0.942373151  |
| C25  | 2.247298011  | -0.333730868 | 2.785935106  |
| C26  | 3.581143443  | -0.53722022  | 3.15833252   |
| C27  | 4.26328408   | -0.617607236 | 1.954414102  |
| N28  | 2.035849758  | 1.212619962  | -1.460291732 |
| N29  | 3.307973434  | 0.741472652  | -1.321577318 |
| C30  | 2.121343658  | 2.338639853  | -2.187956112 |
| C31  | 3.450650544  | 2.608581541  | -2.529989368 |
| C32  | 4.166958269  | 1.567330348  | -1.955455656 |
| B33  | 3.680542507  | -0.573986833 | -0.571797853 |
| Se34 | -0.226451506 | 2.536054551  | 1.81826712   |
| C35  | 1.523153799  | 3.197851551  | 2.394122978  |
| C36  | 2.529439297  | 3.530277517  | 1.476518805  |
| C37  | 3.744718999  | 4.059584914  | 1.915655249  |
| C38  | 3.973634915  | 4.273567086  | 3.275727175  |
| C39  | 2.973786927  | 3.949152614  | 4.19429535   |
| C40  | 1.760599924  | 3.412991747  | 3.759691189  |
| H41  | -0.189205299 | -2.927974793 | 2.055675732  |
| H42  | -2.239570382 | -4.760393588 | 2.132559138  |
| H43  | -4.012860289 | -3.796970288 | 0.259053499  |

|     |              |              |              |
|-----|--------------|--------------|--------------|
| H44 | 0.225478805  | -0.296976948 | -3.879593991 |
| H45 | -1.591311893 | -1.589793931 | -5.494411075 |
| H46 | -3.61943377  | -2.252476665 | -3.75348737  |
| H47 | -2.624237129 | 2.87728098   | 0.535879174  |
| H48 | -5.348321163 | 2.643764562  | 0.233275933  |
| H49 | -5.664659253 | 0.059981657  | -0.666145559 |
| H50 | -4.294062174 | -1.929364414 | -1.350815742 |
| H51 | 0.166329754  | -3.268818217 | -1.784186262 |
| H52 | 2.39635076   | -4.655543482 | -2.611736963 |
| H53 | 4.472085368  | -2.993004753 | -1.891030204 |
| H54 | 1.378313566  | -0.172981984 | 3.409347088  |
| H55 | 3.992198749  | -0.595442557 | 4.154491399  |
| H56 | 5.313726914  | -0.758638786 | 1.745801647  |
| H57 | 1.22894718   | 2.906551757  | -2.417953511 |
| H58 | 3.835896705  | 3.437574111  | -3.103465415 |
| H59 | 5.226069234  | 1.356376053  | -1.955557753 |
| H60 | 4.859159469  | -0.754880174 | -0.713445122 |
| H61 | 2.357510854  | 3.389614412  | 0.414723087  |
| H62 | 4.51131316   | 4.31153051   | 1.186823377  |
| H63 | 4.916410546  | 4.693967921  | 3.615438659  |
| H64 | 3.135827621  | 4.11709639   | 5.256628424  |
| H65 | 0.983473213  | 3.175085015  | 4.479474969  |

**TP<sub>2</sub>LaTePh**

| <b>atom</b> | <b>x</b>     | <b>y</b>     | <b>z</b>     |
|-------------|--------------|--------------|--------------|
| La1         | 0.362628871  | 0.710074564  | -0.732459363 |
| N2          | 2.093835548  | -0.987920495 | -1.831348227 |
| N3          | 3.405648996  | -0.65497631  | -1.992736575 |
| C4          | 1.988569976  | -2.288104745 | -2.141620038 |
| C5          | 3.232524737  | -2.812700226 | -2.515066177 |
| C6          | 4.102342042  | -1.738194957 | -2.404312963 |
| N7          | 1.855613512  | 1.962315379  | -2.625017633 |
| N8          | 3.206595092  | 1.77213813   | -2.68125714  |
| C9          | 1.56791413   | 2.858039623  | -3.581899608 |
| C10         | 2.725436716  | 3.259472747  | -4.260674211 |
| C11         | 3.742764015  | 2.542787842  | -3.65355461  |
| N12         | 2.663934162  | 1.43773909   | 0.349585875  |
| N13         | 3.848607379  | 1.219399238  | -0.28858114  |
| C14         | 2.967035821  | 1.832062843  | 1.595698739  |
| C15         | 4.354336406  | 1.880795369  | 1.77742793   |
| C16         | 4.872332464  | 1.483209075  | 0.553281042  |
| B17         | 3.957522763  | 0.78035256   | -1.777214345 |
| N18         | 0.90715031   | -1.172298996 | 1.152869146  |
| N19         | -0.064736154 | -1.821889938 | 1.846497788  |
| C20         | 2.071295677  | -1.719296886 | 1.530177024  |

|      |              |              |              |
|------|--------------|--------------|--------------|
| C21  | 1.862141258  | -2.731881191 | 2.477153135  |
| C22  | 0.485615882  | -2.761752379 | 2.646243479  |
| N23  | -1.423042232 | -1.219973356 | -0.87788142  |
| N24  | -2.010543961 | -1.751762913 | 0.230438132  |
| C25  | -2.039259714 | -1.767519096 | -1.937940426 |
| C26  | -3.031041643 | -2.66440752  | -1.526513212 |
| C27  | -2.97815469  | -2.616606846 | -0.140841118 |
| N28  | -1.121084362 | 1.067237009  | 1.422860284  |
| N29  | -1.74532174  | 0.039277717  | 2.064154328  |
| C30  | -1.456433696 | 2.185937558  | 2.082664387  |
| C31  | -2.292144553 | 1.893506157  | 3.166298539  |
| C32  | -2.453523775 | 0.518371164  | 3.110176988  |
| B33  | -1.552105931 | -1.449008016 | 1.685709939  |
| Te34 | -1.758585638 | 2.902234104  | -2.026978446 |
| C35  | -3.6591303   | 2.377276915  | -1.156424721 |
| C36  | -4.215778546 | 3.165280098  | -0.138318821 |
| C37  | -5.468035958 | 2.859420401  | 0.401011666  |
| C38  | -6.191733377 | 1.761357542  | -0.06750354  |
| C39  | -5.648410785 | 0.97409616   | -1.084266683 |
| C40  | -4.396357721 | 1.280218254  | -1.62559966  |
| H41  | 1.029358061  | -2.78280462  | -2.066614986 |
| H42  | 3.466143139  | -3.821691963 | -2.819333607 |
| H43  | 5.163865644  | -1.666548312 | -2.591161247 |

|     |              |              |              |
|-----|--------------|--------------|--------------|
| H44 | 0.544348602  | 3.165119035  | -3.748091776 |
| H45 | 2.807238756  | 3.964227717  | -5.074005203 |
| H46 | 4.805721003  | 2.51944052   | -3.844995593 |
| H47 | 2.176107386  | 2.051951084  | 2.300860045  |
| H48 | 4.900662219  | 2.164932035  | 2.663897979  |
| H49 | 5.894549809  | 1.375246274  | 0.221201406  |
| H50 | 5.121938581  | 0.778108556  | -2.070788562 |
| H51 | 2.999076877  | -1.362763297 | 1.105217302  |
| H52 | 2.600229399  | -3.348666805 | 2.967250393  |
| H53 | -0.138058905 | -3.377775783 | 3.277768668  |
| H54 | -1.748187354 | -1.483091941 | -2.941086641 |
| H55 | -3.693229396 | -3.254265835 | -2.141618399 |
| H56 | -3.558002766 | -3.139814644 | 0.605130854  |
| H57 | -1.103366463 | 3.145154849  | 1.728570556  |
| H58 | -2.731345567 | 2.580613277  | 3.873057023  |
| H59 | -3.020956944 | -0.151874646 | 3.73901977   |
| H60 | -2.212822081 | -2.119926643 | 2.430100378  |
| H61 | -3.669733219 | 4.027305644  | 0.232550698  |
| H62 | -5.87842508  | 3.485097756  | 1.190332117  |
| H63 | -7.166807192 | 1.525683516  | 0.350459389  |
| H64 | -6.200278568 | 0.117105797  | -1.463580298 |
| H65 | -3.991968353 | 0.661024457  | -2.420128429 |

**TP<sub>2</sub>LuOPh**

| <b>atom</b> | <b>x</b>     | <b>y</b>     | <b>z</b>     |
|-------------|--------------|--------------|--------------|
| Lu1         | 0.118552096  | -0.436250748 | 0.037452623  |
| N2          | 0.076913942  | 0.413066792  | -2.255737905 |
| N3          | 1.193103481  | 0.963775023  | -2.815872579 |
| C4          | -0.832199884 | 0.314019586  | -3.233598983 |
| C5          | -0.319980751 | 0.808211478  | -4.439371123 |
| C6          | 0.970097279  | 1.208568455  | -4.125071055 |
| N7          | 2.521093685  | -0.752559077 | -0.472950425 |
| N8          | 3.12873905   | 0.020519107  | -1.418490228 |
| C9          | 3.391718275  | -1.719748139 | -0.156269177 |
| C10         | 4.578590434  | -1.580832081 | -0.886894529 |
| C11         | 4.364105108  | -0.461396373 | -1.677015667 |
| N12         | 1.208214692  | 1.804013729  | 0.102409586  |
| N13         | 2.090609321  | 2.227197541  | -0.840620994 |
| C14         | 1.060932852  | 2.819879058  | 0.964195734  |
| C15         | 1.851823702  | 3.913408926  | 0.5838577    |
| C16         | 2.488200177  | 3.490682791  | -0.572503805 |
| B17         | 2.474679172  | 1.302893015  | -2.000897501 |
| N18         | 0.30354127   | -2.515338839 | -1.488836408 |
| N19         | -0.365621101 | -3.664009827 | -1.20868172  |
| C20         | 0.982134751  | -2.741634938 | -2.618853958 |

|     |              |              |              |
|-----|--------------|--------------|--------------|
| C21 | 0.754690798  | -4.045699443 | -3.083933497 |
| C22 | -0.11193951  | -4.59713335  | -2.152587284 |
| N23 | -2.131270725 | -1.346041844 | -0.269219747 |
| N24 | -2.398711401 | -2.673084911 | -0.122541683 |
| C25 | -3.31306391  | -0.724378486 | -0.385641726 |
| C26 | -4.363986509 | -1.648374949 | -0.332922846 |
| C27 | -3.734331874 | -2.872306489 | -0.159733628 |
| N28 | 0.295958075  | -2.362398287 | 1.509215841  |
| N29 | -0.437553948 | -3.490523131 | 1.305755133  |
| C30 | 0.916781626  | -2.512927208 | 2.689422437  |
| C31 | 0.596080912  | -3.747846176 | 3.263979177  |
| C32 | -0.269342744 | -4.331355641 | 2.349011552  |
| B33 | -1.282778869 | -3.737933043 | 0.021273834  |
| O34 | -0.839809544 | 0.57195432   | 1.566697905  |
| C35 | -1.779817947 | 1.024220562  | 2.389414348  |
| C36 | -2.037870537 | 0.384287616  | 3.618676351  |
| C37 | -3.024243828 | 0.867858682  | 4.474772825  |
| C38 | -3.776726534 | 1.996694996  | 4.138656555  |
| C39 | -3.525082527 | 2.640755864  | 2.925796726  |
| C40 | -2.541280374 | 2.166673226  | 2.059509329  |
| H41 | -1.80019817  | -0.119310283 | -3.024076565 |
| H42 | -0.812116486 | 0.865271383  | -5.398079549 |
| H43 | 1.741903568  | 1.653146273  | -4.736385265 |

|     |              |              |              |
|-----|--------------|--------------|--------------|
| H44 | 3.117186407  | -2.474148845 | 0.567773579  |
| H45 | 5.460641711  | -2.201608087 | -0.848894291 |
| H46 | 5.001642043  | 0.028371186  | -2.398661708 |
| H47 | 0.389685461  | 2.712682423  | 1.802874063  |
| H48 | 1.943099488  | 4.870088692  | 1.075855444  |
| H49 | 3.188854355  | 3.995926568  | -1.22151192  |
| H50 | 3.259897287  | 1.843660425  | -2.730937469 |
| H51 | 1.602576673  | -1.964630996 | -3.042662592 |
| H52 | 1.161097241  | -4.517682536 | -3.965467805 |
| H53 | -0.563189661 | -5.576931931 | -2.092804925 |
| H54 | -3.352667435 | 0.352809521  | -0.473400832 |
| H55 | -5.423342119 | -1.453379018 | -0.397428975 |
| H56 | -4.14021254  | -3.868023898 | -0.059127467 |
| H57 | 1.557853612  | -1.727965522 | 3.068940814  |
| H58 | 0.938559724  | -4.153687344 | 4.203539686  |
| H59 | -0.774067304 | -5.285782111 | 2.366651146  |
| H60 | -1.784570639 | -4.82553835  | 0.102847071  |
| H61 | -1.452276585 | -0.494218447 | 3.875358384  |
| H62 | -3.209851731 | 0.356507893  | 5.416791926  |
| H63 | -4.545855245 | 2.366886987  | 4.810568615  |
| H64 | -4.100596808 | 3.521672344  | 2.649154408  |
| H65 | -2.33409453  | 2.67226005   | 1.11940769   |



**Tp<sub>2</sub>LuSPh**

| <b>atom</b> | <b>x</b>     | <b>y</b>     | <b>z</b>     |
|-------------|--------------|--------------|--------------|
| Lu1         | 0.00364643   | -0.751488163 | -0.490051176 |
| N2          | -1.452071712 | 1.105206128  | 0.340081772  |
| N3          | -2.465920559 | 1.637143872  | -0.400502213 |
| C4          | -1.541997318 | 1.669988707  | 1.554731838  |
| C5          | -2.601785049 | 2.583143422  | 1.607205641  |
| C6          | -3.160583514 | 2.529060195  | 0.340359763  |
| N7          | -2.008766996 | -1.165633255 | -1.927910523 |
| N8          | -2.925913865 | -0.180115346 | -2.149155876 |
| C9          | -2.566408804 | -2.30330783  | -2.362482137 |
| C10         | -3.84893847  | -2.06857472  | -2.874723314 |
| C11         | -4.033315875 | -0.704238968 | -2.716386148 |
| N12         | -0.210731326 | 1.060778113  | -2.464761263 |
| N13         | -1.390633741 | 1.708553907  | -2.674227211 |
| C14         | 0.665923092  | 1.617329996  | -3.311916218 |
| C15         | 0.061046024  | 2.632677391  | -4.070464748 |
| C16         | -1.249164811 | 2.657373263  | -3.62808681  |
| B17         | -2.653484011 | 1.327754711  | -1.903313537 |
| N18         | -1.825176186 | -1.858368629 | 0.908352799  |
| N19         | -1.55502319  | -2.918328786 | 1.713804646  |
| C20         | -3.142796137 | -1.640173331 | 1.000197192  |

|     |              |              |              |
|-----|--------------|--------------|--------------|
| C21 | -3.739054395 | -2.558823872 | 1.87509181   |
| C22 | -2.688602154 | -3.354097121 | 2.307737113  |
| N23 | 0.728633045  | -0.929888079 | 1.817592689  |
| N24 | 0.633047233  | -2.090039205 | 2.528434083  |
| C25 | 1.167552716  | 0.004358364  | 2.675341356  |
| C26 | 1.348258812  | -0.538361274 | 3.953372508  |
| C27 | 0.998486864  | -1.872173141 | 3.811255912  |
| N28 | 0.682957304  | -2.997418548 | -0.493272654 |
| N29 | 0.560245356  | -3.786936173 | 0.613095848  |
| C30 | 1.273507753  | -3.743545596 | -1.440876474 |
| C31 | 1.531771613  | -5.028398476 | -0.961986171 |
| C32 | 1.061361535  | -5.007579973 | 0.345491096  |
| B33 | -0.091102878 | -3.326079064 | 1.955597306  |
| S34 | 2.340560242  | 0.633957481  | -0.718590421 |
| C35 | 3.15007259   | 1.597148501  | 0.555483158  |
| C36 | 3.891825643  | 1.059698771  | 1.620042644  |
| C37 | 4.450919542  | 1.89108792   | 2.596205871  |
| C38 | 4.281238143  | 3.276038802  | 2.542330804  |
| C39 | 3.547783452  | 3.824118195  | 1.486396391  |
| C40 | 2.993202507  | 2.998618136  | 0.509655585  |
| H41 | -0.856052566 | 1.392415091  | 2.339234464  |
| H42 | -2.913896759 | 3.192985656  | 2.442070228  |
| H43 | -3.994966512 | 3.065866589  | -0.08741245  |

|     |              |              |              |
|-----|--------------|--------------|--------------|
| H44 | -2.027884058 | -3.235690659 | -2.265840723 |
| H45 | -4.541245943 | -2.780110556 | -3.296861629 |
| H46 | -4.866289483 | -0.064714935 | -2.97110975  |
| H47 | 1.702407984  | 1.316609291  | -3.284065546 |
| H48 | 0.516430082  | 3.270496805  | -4.813090452 |
| H49 | -2.08436268  | 3.284447797  | -3.907225777 |
| H50 | -3.594967413 | 1.959669947  | -2.302179783 |
| H51 | -3.5982562   | -0.827085895 | 0.454022221  |
| H52 | -4.779015981 | -2.625730248 | 2.1572305    |
| H53 | -2.663449821 | -4.183786196 | 2.998737805  |
| H54 | 1.356341602  | 1.011274392  | 2.336918912  |
| H55 | 1.698123666  | -0.032859154 | 4.840725927  |
| H56 | 0.979228445  | -2.677370675 | 4.530855203  |
| H57 | 1.51257341   | -3.30860488  | -2.403242662 |
| H58 | 1.999096972  | -5.848124873 | -1.484066195 |
| H59 | 1.052392632  | -5.774175996 | 1.105698831  |
| H60 | -0.030987992 | -4.232897549 | 2.73825059   |
| H61 | 4.02500971   | -0.015051542 | 1.687183053  |
| H62 | 5.014498848  | 1.446824773  | 3.413348262  |
| H63 | 4.707316354  | 3.917236342  | 3.309973928  |
| H64 | 3.39557376   | 4.900056639  | 1.427334527  |
| H65 | 2.409699685  | 3.433338286  | -0.296452548 |

**TP<sub>2</sub>LuSePh**

| <b>atom</b> | <b>x</b>     | <b>y</b>     | <b>z</b>     |
|-------------|--------------|--------------|--------------|
| Lu1         | 0.119117673  | 0.209727096  | -0.546142181 |
| N2          | -0.966395269 | -1.58233685  | 0.714829674  |
| N3          | -2.221339617 | -2.010009122 | 0.39415305   |
| C4          | -0.566490794 | -2.325175867 | 1.757724805  |
| C5          | -1.56336423  | -3.233418525 | 2.131102474  |
| C6          | -2.596338906 | -2.995982403 | 1.236855844  |
| N7          | -1.160313593 | -0.83485196  | -2.353208574 |
| N8          | -2.329503803 | -1.487778476 | -2.103450325 |
| C9          | -0.85782702  | -1.068397257 | -3.637546588 |
| C10         | -1.834165187 | -1.87259565  | -4.237053785 |
| C11         | -2.749042797 | -2.114739011 | -3.221994225 |
| N12         | -2.278666757 | 1.024039819  | -0.474105111 |
| N13         | -3.299243091 | 0.116301289  | -0.466613542 |
| C14         | -2.850048811 | 2.224291256  | -0.288477794 |
| C15         | -4.238103839 | 2.102421818  | -0.149095955 |
| C16         | -4.478179163 | 0.74372384   | -0.267434961 |
| B17         | -3.062724175 | -1.373502936 | -0.739979359 |
| N18         | 1.413865382  | -1.774994562 | -1.307581381 |
| N19         | 2.769646111  | -1.762402659 | -1.4065342   |
| C20         | 1.023769738  | -3.019781074 | -1.612691527 |

|      |              |              |              |
|------|--------------|--------------|--------------|
| C21  | 2.128789368  | -3.828084745 | -1.908546158 |
| C22  | 3.219831315  | -2.984759695 | -1.761127111 |
| N23  | 1.998685971  | -0.159634992 | 1.035053959  |
| N24  | 3.269636712  | -0.369081464 | 0.588465972  |
| C25  | 2.066243189  | -0.160322855 | 2.374009664  |
| C26  | 3.377546182  | -0.392536148 | 2.807704711  |
| C27  | 4.108947078  | -0.513396085 | 1.638004567  |
| N28  | 1.879588166  | 1.173549118  | -1.826698103 |
| N29  | 3.16545037   | 0.729221348  | -1.709776493 |
| C30  | 1.931346456  | 2.33196885   | -2.503808417 |
| C31  | 3.249298997  | 2.647009196  | -2.840088767 |
| C32  | 3.996505963  | 1.602854527  | -2.310237145 |
| B33  | 3.574097811  | -0.545693065 | -0.912930033 |
| Se34 | -0.076390525 | 2.561333217  | 1.235658547  |
| C35  | 1.390090826  | 2.956648889  | 2.466820087  |
| C36  | 2.677900248  | 3.31906636   | 2.04853063   |
| C37  | 3.668931712  | 3.629222745  | 2.983276409  |
| C38  | 3.394309357  | 3.590906885  | 4.352130195  |
| C39  | 2.110271832  | 3.243415991  | 4.77698831   |
| C40  | 1.119907167  | 2.930487707  | 3.845242779  |
| H41  | 0.41685112   | -2.17787541  | 2.179214766  |
| H42  | -1.536552456 | -3.955220552 | 2.933301208  |
| H43  | -3.569512322 | -3.455362547 | 1.142858607  |

|     |              |              |              |
|-----|--------------|--------------|--------------|
| H44 | 0.052819827  | -0.664871515 | -4.058537315 |
| H45 | -1.871069634 | -2.228251289 | -5.255061822 |
| H46 | -3.667773214 | -2.68292687  | -3.215701135 |
| H47 | -2.238959401 | 3.113179142  | -0.230308188 |
| H48 | -4.957027041 | 2.888160974  | 0.025033641  |
| H49 | -5.397089851 | 0.177181399  | -0.22401939  |
| H50 | -4.112327157 | -1.952736291 | -0.804505243 |
| H51 | -0.025866864 | -3.274918574 | -1.606442845 |
| H52 | 2.133162126  | -4.871350724 | -2.185367498 |
| H53 | 4.278462142  | -3.167127932 | -1.874719835 |
| H54 | 1.181727132  | 0.044160026  | 2.959016524  |
| H55 | 3.740660528  | -0.430906702 | 3.823188192  |
| H56 | 5.162995491  | -0.686292803 | 1.47657613   |
| H57 | 1.024086432  | 2.887543236  | -2.700532815 |
| H58 | 3.608786982  | 3.509462889  | -3.379317027 |
| H59 | 5.061364922  | 1.423285781  | -2.315375443 |
| H60 | 4.748931314  | -0.733844886 | -1.069553481 |
| H61 | 2.903556125  | 3.357660159  | 0.987133094  |
| H62 | 4.663134071  | 3.90393644   | 2.638051699  |
| H63 | 4.166951176  | 3.832968913  | 5.077190083  |
| H64 | 1.875881787  | 3.214106495  | 5.839133824  |
| H65 | 0.121438478  | 2.667350904  | 4.18348419   |

**TP<sub>2</sub>LuTePh**

| <b>atom</b> | <b>x</b>     | <b>y</b>     | <b>z</b>     |
|-------------|--------------|--------------|--------------|
| Lu1         | 0.34504121   | 0.442405883  | -0.751196551 |
| N2          | 2.107617969  | -0.9561983   | -1.730382742 |
| N3          | 3.401022511  | -0.524709162 | -1.768123907 |
| C4          | 2.121956636  | -2.236057973 | -2.126991766 |
| C5          | 3.423915924  | -2.644636197 | -2.44070905  |
| C6          | 4.202455755  | -1.523319672 | -2.196949133 |
| N7          | 1.649833775  | 1.805584336  | -2.551750839 |
| N8          | 3.01548408   | 1.818954287  | -2.510751587 |
| C9          | 1.31498611   | 2.605733064  | -3.577627975 |
| C10         | 2.450308939  | 3.148710535  | -4.1924758   |
| C11         | 3.511111169  | 2.618860033  | -3.479250058 |
| N12         | 2.210248201  | 1.451789596  | 0.427703851  |
| N13         | 3.478038824  | 1.407603419  | -0.07328936  |
| C14         | 2.302419975  | 1.987874174  | 1.653655035  |
| C15         | 3.630567085  | 2.308927681  | 1.954889417  |
| C16         | 4.341120384  | 1.92295512   | 0.827982048  |
| B17         | 3.798234811  | 0.954167696  | -1.520599336 |
| N18         | 0.944900217  | -1.264114062 | 0.978447896  |
| N19         | -0.000190014 | -1.96924342  | 1.651033319  |
| C20         | 2.13126301   | -1.72281446  | 1.396349267  |

|      |              |              |              |
|------|--------------|--------------|--------------|
| C21  | 1.962117191  | -2.734746875 | 2.350283754  |
| C22  | 0.586559254  | -2.858058396 | 2.481021641  |
| N23  | -1.22462107  | -1.326834716 | -1.086862298 |
| N24  | -1.867034146 | -1.916910548 | -0.039867234 |
| C25  | -1.780391024 | -1.812786836 | -2.208003239 |
| C26  | -2.784389996 | -2.734113095 | -1.897789079 |
| C27  | -2.804426241 | -2.764554654 | -0.509279131 |
| N28  | -1.053701157 | 0.852308133  | 1.174346649  |
| N29  | -1.71026501  | -0.157048393 | 1.813713262  |
| C30  | -1.397253098 | 1.989146039  | 1.799225599  |
| C31  | -2.266685934 | 1.724401198  | 2.861743736  |
| C32  | -2.442881655 | 0.349512163  | 2.827867559  |
| B33  | -1.491025826 | -1.643589031 | 1.446953861  |
| Te34 | -1.635001083 | 2.530147836  | -1.982916305 |
| C35  | -3.464003604 | 2.543687853  | -0.875198872 |
| C36  | -3.932505181 | 3.772971725  | -0.384869904 |
| C37  | -5.143851913 | 3.856712985  | 0.302249004  |
| C38  | -5.908677128 | 2.710201442  | 0.520705383  |
| C39  | -5.452147981 | 1.482939312  | 0.037096028  |
| C40  | -4.244100476 | 1.399362341  | -0.659279461 |
| H41  | 1.200640792  | -2.800612059 | -2.15675596  |
| H42  | 3.752324371  | -3.610304524 | -2.793100004 |
| H43  | 5.264852971  | -1.360251312 | -2.306151796 |



|     |              |              |              |
|-----|--------------|--------------|--------------|
| H44 | 0.278623016  | 2.765837365  | -3.837081052 |
| H45 | 2.488243891  | 3.828223478  | -5.0304826   |
| H46 | 4.578241926  | 2.748496272  | -3.588870074 |
| H47 | 1.414231892  | 2.108896218  | 2.257354738  |
| H48 | 4.017715103  | 2.758194313  | 2.856567448  |
| H49 | 5.395183677  | 1.986366513  | 0.600013404  |
| H50 | 4.979134701  | 1.07403748   | -1.701867369 |
| H51 | 3.044816605  | -1.307618647 | 0.995433967  |
| H52 | 2.727399286  | -3.29186866  | 2.868948414  |
| H53 | -0.012470641 | -3.506105696 | 3.103784005  |
| H54 | -1.449948565 | -1.457447519 | -3.175082672 |
| H55 | -3.410195088 | -3.287658918 | -2.580458745 |
| H56 | -3.420287234 | -3.328658214 | 0.175259188  |
| H57 | -1.034247495 | 2.937723575  | 1.428253777  |
| H58 | -2.72347254  | 2.4332005    | 3.534818252  |
| H59 | -3.040115522 | -0.301912476 | 3.448645671  |
| H60 | -2.171621615 | -2.335957535 | 2.151182601  |
| H61 | -3.34374165  | 4.672314593  | -0.545523791 |
| H62 | -5.487462396 | 4.8214851    | 0.668993196  |
| H63 | -6.852079949 | 2.774509207  | 1.056952889  |
| H64 | -6.042037721 | 0.583178608  | 0.196516586  |
| H65 | -3.908907848 | 0.439852537  | -1.040386257 |

## References

- (i) Sheldrick, G. M. *SHELXTL, An Integrated System for Solving, Refining and Displaying Crystal Structures from Diffraction Data*; University of Göttingen, Göttingen, Federal Republic of Germany, 1981.
- (ii) Schrödinger, LLC, Portland, OR.
- (iii) (a) Becke, A. D. *J. Chem. Phys.* **1993**, *98*, 5648-5652.  
(b) Becke, A. D. *Phys. Rev. A* **1988**, *38*, 3098-3100.  
(c) Lee, C. T.; Yang, W. T.; Parr, R. G. *Phys. Rev. B* **1988**, *37*, 785-789.  
(d) Vosko, S. H.; Wilk, L.; Nusair, M. *Can. J. Phys.* **1980**, *58*, 1200-1211.  
(e) Slater, J. C. *Quantum Theory of Molecules and Solids, Vol. 4: The Self-Consistent Field for Molecules and Solids*; McGraw-Hill: New York, 1974.
- (iv) Gaussian 03, Revision C.02, Frisch, M. J.; Trucks, G. W.; Schlegel, H. B.; Scuseria, G. E.; Robb, M. A.; Cheeseman, J. R.; Montgomery, Jr., J. A.; Vreven, T.; Kudin, K. N.; Burant, J. C.; Millam, J. M.; Iyengar, S. S.; Tomasi, J.; Barone, V.; Mennucci, B.; Cossi, M.; Scalmani, G.; Rega, N.; Petersson, G. A.; Nakatsuji, H.; Hada, M.; Ehara, M.; Toyota, K.; Fukuda, R.; Hasegawa, J.; Ishida, M.; Nakajima, T.; Honda, Y.; Kitao, O.; Nakai, H.; Klene, M.; Li, X.; Knox, J. E.; Hratchian, H. P.; Cross, J. B.; Bakken, V.; Adamo, C.; Jaramillo, J.; Gomperts, R.; Stratmann, R. E.; Yazyev, O.; Austin, A. J.; Cammi, R.; Pomelli, C.; Ochterski, J. W.; Ayala, P. Y.; Morokuma, K.; Voth, G. A.; Salvador, P.; Dannenberg, J. J.; Zakrzewski, V. G.; Dapprich, S.; Daniels, A. D.; Strain, M. C.; Farkas, O.; Malick, D. K.; Rabuck, A. D.; Raghavachari, K.; Foresman, J. B.; Ortiz, J. V.; Cui, Q.; Baboul, A. G.; Clifford, S.; Cioslowski, J.; Stefanov, B. B.; Liu, G.; Liashenko, A.; Piskorz, P.; Komaromi, I.; Martin, R. L.; Fox, D. J.; Keith, T.; Al-Laham, M. A.; Peng, C. Y.; Nanayakkara, A.; Challacombe, M.; Gill, P. M. W.; Johnson, B.; Chen, W.; Wong, M. W.; Gonzalez, C.; and Pople, J. A.; Gaussian, Inc., Wallingford CT, 2004.

- (v) Manson, J. M. B.; Webster, C. E.; Hall, M. B. Jimp 2 Version 0.089 (2006);  
Department of Chemistry, Texas A&M University, College Station, TX 77842,  
(<http://www.chem.tamu.edu/jimp2/>).
- (vi) Hall, M. B.; Fenske, R. F. *Inorg. Chem.* **1972**, *11*, 768-775.
- (vii) Version 2.0, June 1993; Lichtenberger, D. L. Department of Chemistry, University  
of Arizona, Tuscon, AZ 85721.
